1       **Fibroblasts-derived from Pluripotent Cells Harboring a Single Allele**  
2       **Knockout in Two Pluripotency Genes Exhibit DNA Methylation**  
3       **Abnormalities and pluripotency induction Defects**  
4

5 Rachel Lasry<sup>1,3</sup>, Noam Maoz<sup>1,3</sup>, Albert W. Cheng<sup>2</sup>, Nataly Yom Tov<sup>1</sup>, Elisabeth Kulenkampff<sup>2</sup>, Meir  
6 Azagury<sup>1</sup>, Hui Yang<sup>2</sup>, Cora Ople<sup>2</sup>, Styliani Markoulaki<sup>2</sup>, Dina A. Faddah<sup>2</sup>, Kirill Makedonski<sup>1</sup>, Ofra Sabbag<sup>1</sup>,  
7 Rudolf Jaenisch<sup>2</sup> and Yosef Buganim<sup>1,\*</sup>

- 8  
9
- 10       1. Department of Developmental Biology and Cancer Research, The Institute for Medical Research
  - 11       Israel-Canada, The Hebrew University-Hadassah Medical School, Jerusalem 91120, Israel
  - 12       2. Whitehead Institute for Biomedical Research, Cambridge, MA 02142, USA; Department of
  - 13       Biology, Massachusetts Institute of Technology, Cambridge, MA 02139, USA
  - 14       3. This authors contributed equally to this work

15  
16       \*Correspondence should be addressed to Y.B. ([yossib@ekmd.huji.ac.il](mailto:yossib@ekmd.huji.ac.il))

17 **ABSTRACT**

18 A complete knockout (KO) of a single key pluripotency gene has been shown to drastically affect  
19 embryonic stem cell (ESC) function and epigenetic reprogramming. However, knockin (KI)/KO of a  
20 reporter gene only in one of two alleles in a single pluripotency gene is considered harmless and is  
21 largely used in the stem cell field. Here, we sought to understand the impact of simultaneous  
22 elimination of a single allele in two ESC key genes on pluripotency potential and acquisition. We  
23 established multiple pluripotency systems harboring KI/KO in a single allele of two different pluripotency  
24 genes (i.e. *Nanog*<sup>+/-</sup>; *Sall4*<sup>+/-</sup>, *Nanog*<sup>+/-</sup>; *Utf1*<sup>+/-</sup>, *Nanog*<sup>+/-</sup>; *Esrrb*<sup>+/-</sup> and *Sox2*<sup>+/-</sup>; *Sall4*<sup>+/-</sup>). Interestingly,  
25 although these double heterozygous mutant lines maintain their stemness and contribute to chimeras  
26 equally to their parental control cells, fibroblasts derived from these systems show a significant  
27 reduction in their capability to induce pluripotency either by Oct4, Sox2, Klf4 and Myc (OSKM) or by  
28 nuclear transfer (NT). Tracing the expression of *Sall4* and *Nanog*, as representative key pluripotency  
29 targeted genes, at early phases of reprogramming could not explain the seen delay/blockage. Further  
30 exploration identifies abnormal methylation landscape around pluripotent and developmental genes in  
31 the double heterozygous mutant fibroblasts. Accordingly, treatment with 5-azacytidine two days prior to  
32 transgene induction rescues the reprogramming defects. This study emphasizes the importance of  
33 maintaining two intact alleles for pluripotency induction and suggests that insufficient levels of key  
34 pluripotency genes leads to DNA methylation abnormalities in the derived-somatic cells later on in  
35 development.

36

## 37 INTRODUCTION

38 Fluorescent reporter genes are widely used to monitor cell states such as stemness, differentiation, cell  
39 cycle and migration (Benchetrit et al., 2019; Eastman et al., 2020). One common strategy to introduce a  
40 reporter gene is by a knockin/knockout (KI/KO) approach. In this strategy, a fluorescent gene is  
41 introduced into a *locus* of interest by replacing the endogenous gene with a fluorescent reporter, leaving  
42 the targeted gene with only one functional allele. Many fluorescent reporter cell lines have been  
43 generated over the years using this approach, targeting either pluripotency genes such as *Sox2* (Arnold  
44 et al., 2011; Avilion et al., 2003), *Nanog* (Meissner et al., 2007; Wernig et al., 2008) and *Utf1* (Morshedi  
45 et al., 2013) or early differentiation genes such as *Gata6* (Heslop et al., 2021). Such reporter lines are  
46 useful among others in studying the mechanisms underlying exit from pluripotency and somatic nuclear  
47 reprogramming. By producing engineered fibroblasts from these embryonic stem cell (ESC) reporter  
48 lines one can easily monitor pluripotency acquisition following the transduction of a set of transcription  
49 factors such as OCT4, SOX2, KLF4 and MYC (OSKM) (Buganim et al., 2012; Buganim et al., 2014) or  
50 following nuclear transfer (Boiani et al., 2002).

51 While elimination of one allele of one gene is considered harmless to the cell, a complete KO may be  
52 detrimental to the cell as seen in the case of *Oct4* and *Sox2* KO for pluripotent cells (Masui et al., 2007;  
53 Nichols et al., 1998). In contrast, a complete elimination of other important pluripotent genes such as  
54 *Nanog*, partially maintains the pluripotent state and contributes to chimeras, but shows a dramatic  
55 reduced reprogramming efficiency by their fibroblast derivatives that can only be partially overcome by  
56 high levels of exogenous OSKM factors (Carter et al., 2014; Schwarz et al., 2014). Although KI/KO of one  
57 allele is a widely used approach to introduce a reporter gene, our previous study suggests that the  
58 quality of the reprogramming process to pluripotency might be affected by the loss of even one allele as  
59 fibroblasts with only one intact allele of *Nanog* generated lower quality iPSCs compared to controls as  
60 assessed by the stringent pluripotency test, the tetraploid complementation (4n) assay (Buganim et al.,  
61 2014).

62 During the maturation phase of the reprogramming process, which is thought to be the bottleneck of  
63 the process, epigenetic changes happen stochastically to eventually allow expression of the first  
64 pluripotent-related genes (Buganim et al., 2013). Using single-cell analyses, it has been shown that  
65 stochastic low expression of pluripotent genes such as *Utf1*, *Esrrb*, *Sall4* (Buganim et al., 2012) and  
66 *Nanog* (Polo et al., 2012) can be observed early on in the process in a small fraction of induced cells  
67 which is correlated to the low efficiency of reprogramming. The stochastic behavior of the maturation  
68 phase ends with the activation of late pluripotent genes such as *Sox2*, *Dppa4*, *Prdm14* and *Gdf3*

69 (Buganim et al., 2012; Soufi et al., 2012) which unleashes the final deterministic phase of  
70 reprogramming which leads to stabilization by activation of the core pluripotency network, transgene  
71 silencing and complete epigenetic resetting (Buganim et al., 2013).  
72 While major efforts have been put to decipher how the identity and levels of the exogenous pluripotent  
73 reprogramming factors are linked to efficiency of reprogramming and quality of the resulting iPSCs  
74 (Benchetrit et al., 2015; Buganim et al., 2013; Theunissen and Jaenisch, 2014), studies dealing with the  
75 effect of reduced levels of endogenous pluripotency genes during development or during pluripotency  
76 induction are mostly based on one gene KO approach, that eliminates completely the expression of the  
77 targeted gene, or on haploid ESC systems that become diploid very soon during development (Elling et  
78 al., 2019; Leeb and Wutz, 2011). Thus, there is very little knowledge of how reduced levels of multiple  
79 endogenous pluripotency genes in pluripotent cells affects their developmental potential and their  
80 somatic cell derivatives.  
81 Here, we sought to examine how elimination of one allele of two pluripotency genes in different  
82 pluripotent systems affects their developmental potential and the efficiency of the reprogramming  
83 process of their fibroblast derivatives. We produced three secondary systems where two pluripotency  
84 genes were KO only in one of the two alleles. These double heterozygous mutant lines include NGFP2  
85 ( $Nanog^{+/-};Sall4^{+/-}$ ,  $Nanog^{+/-};Esrrb^{+/-}$  and  $Nanog^{+/-};Utf1^{+/-}$ ), NGFP1 ( $Nanog^{+/-};Sall4^{+/-}$ ) and SGFP1 ( $Sox2^{+/-}$   
86  $;Sall4^{+/-}$ ). Interestingly, while all double heterozygous mutant lines were capable of contributing to  
87 chimeras in a comparable manner to their parental secondary iPSC systems (i.e. NGFP2 ( $Nanog^{+/-}$ ),  
88 NGFP1 ( $Nanog^{+/-}$ ) and SGFP1 ( $Sox2^{+/-}$ )), multiple derivations of fibroblasts from these lines resulted in  
89 poor reprogramming efficiency ranging from a complete blockage at the mesenchymal to epithelial  
90 (MET) transition (NGFP2 line) to a late blockage at the stabilization step just before the acquisition of  
91 pluripotency (NGFP1 and SGFP1 lines). This reduced efficiency was not limited to reprogramming by  
92 defined factors but also was evident in nuclear transfer (NT). To understand whether reduced early  
93 stochastic expression of these key pluripotency genes can explain the low efficiency of the  
94 reprogramming process we generated tracing systems for *Sall4* and *Nanog* as major determinants for  
95 the reprogramming process. Tracing *Sall4* or *Nanog* locus activation along the reprogramming process  
96 revealed that only a very small fraction of cells activated these *loci*, at one point during the stochastic  
97 phase, a result that cannot explain the global blockage seen during the reprogramming process with  
98 these double heterozygous mutant lines. To further understand this phenomenon, we profiled the CpG-  
99 riched methylation landscape of fibroblasts derived from SGFP1 double heterozygous mutant line and  
100 their parental control. Interestingly, a clear difference in the methylation levels of multiple

101 developmental and pluripotent *loci* was observed between the double heterozygous mutant fibroblasts  
102 and their parental control cells. In agreement with that, treating double heterozygous mutant  
103 fibroblasts for two days prior to factor induction with 5-azacytidine rescued the reprogramming  
104 blockage and allowed the induction of pluripotency. This study emphasizes the importance of having  
105 two intact alleles for proper pluripotency induction and for normal embryonic development and raises a  
106 concern regarding the often used approach of reporter introduction using a KI/KO targeting technique.

107

## 108 **RESULTS**

### 109 ***Double heterozygous mutant pluripotent cells contribute to chimeras and exhibit modest*** 110 ***transcriptional changes***

111 Given the importance of properly functioning core ESC circuitry for the establishment and maintenance  
112 of pluripotency, we hypothesized that even a small reduction in gene expression of few key pluripotency  
113 genes might hold a dramatic effect on the developmental potential of the cells or on their derivatives to  
114 undergo nuclear reprogramming.

115 We decided to focus our research on secondary iPSC systems as these systems on the one hand  
116 contribute to chimeras and on the other hand exhibit stable and reproducible reprogramming efficiency  
117 by minimizing cell heterogeneity (Wernig et al., 2008). Moreover, it allows us to compare a single allele  
118 KO of one gene to a single allele KO of two genes with minimal background heterogeneity (Haenebalcke  
119 et al., 2013).

120 We started by targeting the NGFP2 secondary system as it already contains a single KI/KO allele of  
121 *Nanog* (Wernig et al., 2008). We chose to eliminate a single allele of *Esrrb*, *Utf1* or *Sall4* as they have all  
122 been shown to be important for pluripotency and to play a role in reprogramming during the stochastic  
123 phase (Buganim et al., 2012; Feng et al., 2009; Tsubooka et al., 2009). To produce a single allele KO and  
124 to be able to monitor the activity of the targeted allele, we designed donor vectors that fused, in frame,  
125 to the first or second exon a tdTomato reporter (**Figure 1A-B**). Moreover, although a stop codon at the  
126 end of the tdTomato was introduced to the targeted allele, to avoid exon skipping and to completely  
127 destabilizing the mRNA of the targeted allele we did not add polyA to the targeting vectors. NGFP2 iPSCs  
128 were electroporated with either of the three targeting vectors and treated with neomycin for a week.  
129 Stable colonies were isolated, expanded and examined for correct targeting by southern blots using  
130 external or internal probes (**Figure 1C**, correctly targeted clones are marked by red asterisks). Overall,  
131 we isolated two correctly targeted colonies for each combination of manipulated genes:  $Nanog^{+/-}$ ;  
132  $Esrrb^{+/-}$  ( $NGFP2^{N+/-;E+/-}$ ),  $Nanog^{+/-}$ ;  $Utf1^{+/-}$  ( $NGFP2^{N+/-;U+/-}$ ) and  $Nanog^{+/-}$ ;  $Sall4^{+/-}$  ( $NGFP2^{N+/-;S+/-}$ ). To validate

133 the reduced levels of the targeting genes, we cultured the cells in 2i/L medium that recapitulates the  
134 ground pluripotent state and facilitates gene expression from both alleles (Miyazari and Torres-Padilla,  
135 2012). qPCR and western blot analyses clearly demonstrated a reduction in about 50% of the total  
136 mRNA or protein levels of all targeted alleles (**Figures 1D and S1A**), but not in other key pluripotency  
137 genes such as *Oct4*, *Sox2*, *Lin28*, *Fbxo15* and *Fgf4* as assessed by qPCR (**Figure S1A**). It is important  
138 however to note that out of the examined genes some further reduction in the protein level of NANOG  
139 and ESRRB was seen in NGFP2<sup>N+/-;U+/-</sup> and NGFP2<sup>N+/-;S+/-</sup> iPSC lines (**Figure 1D**) and in the mRNA of the  
140 *Dppa3* gene in NGFP2<sup>N+/-;S+/-</sup> line (**Figure S1A**). These results suggest that NANOG and ESRRB are either  
141 direct or indirect targets of *Sall4* and *Utf1* and that *Dppa3* is regulated by SALL4. To test the stability of  
142 the mRNA of the targeted allele we grew the various double heterozygous mutant lines either in S/Lif or  
143 2i/Lif conditions and subjected them to flow cytometry analysis for GFP and tdTomato activity. As  
144 expected, and in agreement with the western blot analysis, cells grown under S/Lif conditions (i.e.  
145 conditions that mostly facilitate mono-allelic expression of Nanog) exhibited 68% GFP reporter activity  
146 (reporter that was introduced in frame and contains polyA) in NGFP2<sup>N+/-</sup> control and NGFP2<sup>N+/-;E+/-</sup> iPSC  
147 lines, and 55% and 58% in NGFP2<sup>N+/-;S+/-</sup> and NGFP2<sup>N+/-;U+/-</sup> iPSC lines, respectively (**Figure 1E**). In contrast  
148 to the Nanog-GFP reporter and in accordance with our strategy, tdTomato activity for all targeted genes  
149 was minor due to the absence of a polyA which resulted in the destabilization of the targeted mRNA  
150 (**Figure 1E**). A better activation of the Nanog-GFP reporter was noted under 2i/Lif conditions in all clones  
151 but a reduced percentage was still evident in all heterozygous mutant iPSC lines (**Figure S1C**). As in the  
152 S/Lif conditions, the activation of the tdTomato reporter in 2i/Lif conditions was minor but still showed a  
153 stronger activation than S/Lif conditions. These results validate our strategy of eliminating a single allele  
154 in several combinations of two pluripotency genes.

155 We first wished to investigate the impact of eliminating a single allele in two different pluripotent genes  
156 on the developmental potential of the cells. To that end, we injected the three double heterozygous  
157 mutant lines as well as their parental control cells into blastocysts and measured their potential to form  
158 chimeric mice. As can be seen in representative images in Figure S2A, a comparable grade of chimerism  
159 was noted between all double heterozygous mutant lines and control iPSC line, suggesting that  
160 elimination of a single allele in these combinations of two pluripotent genes does not exert a significant  
161 developmental barrier (**Figure S2A**).

162 In our previous study we showed that a gene list of 1716 genes can distinguish between iPSCs with poor,  
163 low and high quality as assessed by grade of chimerism and 4n complementation assay (Buganim et al.,  
164 2014). Thus, we next profiled the transcriptome of the three heterozygous mutant lines, the parental

165 NGFP2<sup>N+/-</sup> cells and wild type (WT) ESC (V6.5) control line under S/Lif or 2i/Lif conditions using RNA-  
166 sequencing (RNA-seq). Correlation heatmap clustered the cells into two main groups based on the  
167 culture conditions used. Nevertheless, within the S/Lif group some changes in gene expression were  
168 noted in NGFP2<sup>N+/-;S+/-</sup> and NGFP2<sup>N+/-;U+/-</sup> compared to NGFP2<sup>N+/-;E+/-</sup>, parental NGFP2<sup>N+/-</sup> and control ESC  
169 line (**Figure S2B**). As *Esrrb* was shown to be a downstream target gene of NANOG and to exert a positive  
170 feedback loop with it (Festuccia et al., 2012; Sevilla et al., 2021), it is not surprising that the parental  
171 NGFP2<sup>N+/-</sup> and NGFP2<sup>N+/-;E+/-</sup> exhibited minimal transcriptional changes between them and clustered very  
172 close to each other. Principal component analysis (PCA) validated the results seen in the correlation  
173 heatmap, separating S/Lif conditions from 2i/Lif conditions by PC1 and NGFP2<sup>N+/-;S+/-</sup> and NGFP2<sup>N+/-;U+/-</sup>  
174 that grown under S/Lif condition from the rest of the samples by PC2 (**Figure S2C**). Interestingly,  
175 NGFP2<sup>N+/-;U+/-</sup> grown under S/Lif conditions, clustered closer to samples that grew under 2i conditions as  
176 indicated by PC1 (**Figure S2C**). These results are in accordance with the notion that UTF1 is mostly  
177 implicated in a more primed pluripotent state and less in the ground state (Martinez-Val et al., 2021).  
178 As expected, cells grown under 2i/Lif conditions clustered together with minimal transcriptional changes  
179 between them (**Figure S2C**). These results suggest that elimination of one allele of two different  
180 pluripotent genes from the tested combinations, although show some small transcriptional change  
181 under S/Lif conditions, can still maintain a functional pluripotency state with minimal variation in gene  
182 expression under ground pluripotency state.

### 183 184 ***Fibroblasts derived from NGFP2 double heterozygous mutant iPSC lines fail to induce pluripotency***

185 Given that the reprogramming process involves a stochastic phase of activation of pluripotency genes  
186 (Buganim et al., 2012), we hypothesized that MEFs harboring double heterozygous mutant alleles might  
187 exhibit reprogramming delay due to difficulties in the activation of the core pluripotency circuitry.

188 To that end, secondary MEF systems were established from all the three NGFP2 double heterozygous  
189 mutant lines, as well as from the parental NGFP2 control. These secondary MEF systems contain a  
190 unique integration pattern of OSKM transgenes under Tet-on promotor and a M2rtTA transactivator in  
191 the *Rosa26 locus* (Wernig et al., 2008). To initiate reprogramming, MEFs were exposed to dox for 13  
192 days followed by dox withdrawal for 3 more days to stabilize any iPSC colony, and the percentage of  
193 Nanog-GFP-positive cells was scored by flow cytometry.

194 In accordance with our hypothesis, while NGFP2<sup>N+/-</sup> control cells exhibited the expected ~2% of Nanog-  
195 GFP-positive cells (Buganim et al., 2012; Wernig et al., 2008), all the double heterozygous mutant lines  
196 showed a blockage in reprogramming (**Figure 2A**). This blockage was not due to cell death or

197 proliferation arrest as all double heterozygous mutant and control plates stained equally to crystal  
198 violet, indicating a comparable number of cells between all mutant lines and control (**Figure 2B**).  
199 However, in agreement with the flow cytometry results, although all the double heterozygous mutant  
200 lines stained positive to the early reprogramming marker alkaline phosphatase (AP), implying that the  
201 cells initiated reprogramming, their AP staining was significantly lower compared to the control plates  
202 (**Figure 2C**). By extending the dox exposure time to 20 days, a small percentage of Nanog-GFP-positive  
203 cells (i.e. ~0.3-0.4% Nanog-GFP-positive cells in the mutant lines compared to ~10% in the control line)  
204 did emerge in all double heterozygous mutant lines, suggesting that some cells can overcome this  
205 blockage when prolonged exposure of the 4 factors is triggered (**Figure 2D**).

206 We then asked whether the observed reprogramming blockage within these double heterozygous  
207 mutant MEF lines is specific to reprogramming by defined factors or whether the loss of the two alleles  
208 would show reprogramming defects in other reprogramming techniques as well. We chose to use the  
209 nuclear transfer (NT) technique as it utilizes the entire array of reprogramming proteins within the egg  
210 as opposed to the Yamanaka's approach that uses very few selected reprogramming factors. Enucleated  
211 eggs were injected with MEF nuclei from each of the three double heterozygous mutant MEF lines and  
212 control, and blastocyst formation and the establishment of ESC lines from these blastocysts were  
213 scored. Notably, while all lines exhibited a comparable and expected efficiency in producing blastocysts,  
214 the efficiency of ESC line derivation was significantly lower in the double heterozygous mutant lines  
215 compared to control (i.e. 0-4% in the double heterozygous mutant lines vs 11% in control line, **Figure**  
216 **2F**). Taken together, these results suggest that the elimination of two alleles from two different key  
217 pluripotency genes affects the somatic nucleus in a way that interferes with its capability to undergo  
218 reprogramming to pluripotency by various techniques.

219 We then asked whether the loss of the two alleles causes a permanent reprogramming defect or  
220 whether it can be rescued by exogenously expressing one of the targeted genes. To that end, each  
221 double heterozygous mutant MEF line was transduced with either *Nanog* or with its corresponding  
222 targeted gene (i.e. *Sall4*, *Utf1* or *Esrrb*) or with additional viruses encoding for OSK. Overall, both *Nanog*  
223 or each of the corresponding factor showed either partial (i.e. *Esrrb* in NGFP2<sup>N+/-;E+/-</sup> cells and *Nanog* in  
224 NGFP2<sup>N+/-;S+/-</sup> cells) or complete rescue of the reprogramming blockage, while additional OSK further  
225 boosted the reprogramming process (**Figures 2E and S2D-E**). The fact all the double heterozygous  
226 mutant lines could be rescued by the addition of different pluripotent factors, suggests that the seen  
227 blockage is not specific to the unique function of the eliminated alleles' but rather is associated with a  
228 more general effect.



229

230

231 ***NGFP2<sup>N+/-</sup> double heterozygous mutant lines show an early defect in the activation of epithelial***  
232 ***markers***

233 Given that double heterozygous mutant MEF lines are capable, to some extent, to activate the AP  
234 enzyme (**Figure 2C**), we next sought to understand at which time point during the reprogramming  
235 process the double heterozygous mutant cells lose their capacity to undergo reprogramming. To that  
236 end, we examined the expression level of early reprogramming markers (*Fgf4* and *Fbxo15*), intermediate  
237 markers (*endogenous Oct4* and *Sall4*) and late and predictive markers (*Sox2*, *Utf1*, *Esrrb* and *Lin28*)  
238 following 13 days of dox addition (Buganim et al., 2012; Buganim et al., 2013)). While the double  
239 heterozygous mutant induced cells showed some activation of the early markers and very low  
240 expression of intermediate markers, no activation at all was seen in the late and predictive markers  
241 compared to control cells (**Figure S2F**). These results suggest that the blockage seen in these double  
242 heterozygous mutant cells during reprogramming occurs relatively early in the reprogramming process.  
243 It is interesting to note that out of the three double heterozygous mutant lines, NGFP2<sup>N+/-;S+/-</sup> showed  
244 the strongest inhibitory effect as assessed by marker expression (**Figure S2F**), Nanog-GFP activation in  
245 the *Nanog* rescue experiment (**Figure S2D**), and AP staining (**Figure 2C**).

246 We next profiled the transcriptome of the three double heterozygous mutant lines and control lines (i.e.  
247 NGFP2<sup>N+/-</sup> cells, and NGFP2<sup>N+/-</sup> cells that were infected with empty vector (EV)) following six days of  
248 reprogramming. We chose this time point as it showed a clear reprogramming delay in the double  
249 heterozygous mutant plates compared to control plates. NGFP2<sup>N+/-</sup> MEFs and the parental NGFP2<sup>N+/-</sup>  
250 iPSCs were profiled as well. Hierarchical clustering analysis showed that all the double heterozygous  
251 mutant lines clustered together and different than the control lines (**Figure 3A**). PCA and scatter plots  
252 emphasize even more the transcriptomic differences between the double heterozygous mutant lines  
253 and NGFP2<sup>N+/-</sup> control lines after 6 days of dox. While the control lines demonstrated significant  
254 transcriptional changes by day 6 of reprogramming (represented by PC2) compared to parental  
255 NGFP2<sup>N+/-</sup> MEFs, all the double heterozygous mutant lines showed minimal transcriptional changes  
256 between themselves or when compared to NGFP2<sup>N+/-</sup> MEFs (**Figure 3B-D**). These results suggest that an  
257 early reprogramming defect is responsible for the delay seen in the NGFP2<sup>N+/-</sup>-double heterozygous  
258 mutant lines.

259 An important and essential early step in reprogramming is mesenchymal to epithelial transition (MET).  
260 In this step the induced cells lose their fibroblastic characteristics and start acquiring an epithelial  
261 identity. As the transcriptome of the double heterozygous mutant lines after 6 days of reprogramming  
262 (**Figure 3B-D**) was still very close to MEFs, we next asked whether the MET process is impaired in the

263 double heterozygous mutant lines. Initially we examined the expression levels of four well-known  
264 fibroblastic markers; *Thy1*, *Col5a1*, *Postn*, and *Des* and noticed that in all mutant lines these markers are  
265 significantly downregulated in a comparable manner to that of the control lines (**Figure 3E**). Similarly, a  
266 comparable downregulation in the expression of the EMT master regulators; *Twist1*, *Zeb1*, *Snai2*, and  
267 *Foxc2* was noted as well (**Figure S3A**), implying that the loss of the fibroblastic identity is not impaired in  
268 the double heterozygous mutant lines. However, when we tested whether the cells are capable of  
269 activating the epithelial program, we noticed that while the control lines are able to activate epithelial  
270 markers such as *Cdh1*, *Dsp*, *Epcam*, *Cldn4*, and *Cldn7*, the double heterozygous mutant lines fail in doing  
271 so (**Figure 3F and S3B**). These results suggest that there is an inherent blockage acquired specifically in  
272 the double heterozygous mutant MEF lines that prevents/delays them from activating a robust epithelial  
273 program as occurs during intact cellular reprogramming.

274  
275 ***Reprogramming impairment caused by double heterozygous allele elimination is not restricted to a***  
276 ***system nor to the identity of the modified alleles***

277 To exclude the possibility that the observed effect is system-specific, we produced additional secondary  
278 double heterozygous mutant iPSC systems that differ in their reprogramming efficiency and dynamics,  
279 developmental potential, allele-specific elimination and reprogramming factor stoichiometry.

280 We decided to produce a double heterozygous mutant line from NGFP1<sup>N<sup>+</sup>/-</sup> system as it was generated in  
281 parallel to the NGFP2<sup>N<sup>+</sup>/-</sup> system but demonstrated different reprogramming efficiency and dynamics  
282 and reprogramming factor induction levels (Wernig et al., 2008).

283 As NGFP2<sup>N<sup>+</sup>/-;S<sup>+</sup>/-</sup> double heterozygous mutant line demonstrated the strongest delay in pluripotency  
284 induction, we decided to eliminate one allele of *Sall4* in NGFP1<sup>N<sup>+</sup>/-</sup> as well. Initially, we confirmed by  
285 single molecule mRNA-FISH that the strong effect seen in NGFP2<sup>N<sup>+</sup>/-;S<sup>+</sup>/-</sup> is not a result of *Sall4* reduction  
286 that is greater than 50%. In agreement with the protein level (**Figure 1D**), Figure 4A shows the  
287 distribution of *Sall4* transcript level in NGFP2<sup>N<sup>+</sup>/-</sup> cells (n=57) compared to NGFP2<sup>N<sup>+</sup>/-;S<sup>+</sup>/-</sup> cells (n=49),  
288 validating transcript reduction of *Sall4* in about 50% within NGFP2<sup>N<sup>+</sup>/-;S<sup>+</sup>/-</sup> cells (**Figure 4A**).

289 Then, we targeted a tdTomato reporter gene into the *Sall4* locus of NGFP1<sup>N<sup>+</sup>/-</sup> as described above to  
290 produce NGFP2<sup>N<sup>+</sup>/-;S<sup>+</sup>/-</sup> (**Figure 4B**). Correctly targeted NGFP1<sup>N<sup>+</sup>/-;S<sup>+</sup>/-</sup> iPSC double heterozygous colonies  
291 were validated by PCR and Western blot (**Figure 4C-D**). We also produced a *Nanog* KO NGFP1<sup>N<sup>-</sup>/-</sup> line as a  
292 single KO gene control (**Figures 4E-F and S4A**). Secondary MEFs were produced from NGFP1<sup>N<sup>+</sup>/-</sup>,  
293 NGFP1<sup>N<sup>+</sup>/-;S<sup>+</sup>/-</sup>, and NGFP1<sup>N<sup>-</sup>/-</sup> which were then exposed to dox for 13 days following by dox withdrawal for  
294 3 more days. Flow cytometry analysis of the various reprogramming plates showed a clear and

295 comparable reduction in the percentage of Nanog-GFP-positive cells in the double heterozygous mutant  
296 cells and in the *Nanog* KO fibroblasts compared to control NGFP1<sup>N+/-</sup> cells (**Figure 4G**). Exogenous  
297 expression of *Nanog*, from the onset of the reprogramming process, rescued both *Nanog* KO cells and  
298 the NGFP1<sup>N+/-;S+/-</sup> double heterozygous mutant cells (**Figure 4G-H**). These intriguing results suggest that  
299 even a reduction of 50% in the levels of two important pluripotency genes (i.e. Nanog and Sall4) is  
300 crucial for the establishment of the core pluripotency circuitry in a way that is comparable to a complete  
301 KO of key pluripotency genes such as *Nanog*.

302 We were interested to examine whether the pluripotency induction impairment seen in the double  
303 heterozygous mutant lines is restricted to combinations that harbor allele elimination of *Nanog*.

304 To that end, we eliminated one allele of *Sall4* in SGFP1<sup>S2+/-</sup> line, a secondary iPSC system that was  
305 generated in our lab and contains GFP reporter instead of one allele of *Sox2*. Correctly targeted  
306 SGFP1<sup>S2+/-;S4+/-</sup> iPSC colonies were validated by PCR, Western blot and immunostaining (**Figures 4I-K and**  
307 **S4B**). In agreement with the other systems, a significant reduction in reprogramming efficiency was  
308 noted in SGFP1<sup>S2+/-;S4+/-</sup> cells compared to SGFP1<sup>S2+/-</sup> control as assessed by flow cytometry and number of  
309 Sox2-GFP-positive colonies (**Figure 4K-M**). It is interesting to note that while all the double heterozygous  
310 NGFP<sup>N+/-</sup> lines produced a neglectable number of iPSCs following 13 days of reprogramming (i.e. 0.0%-  
311 0.2%), the SGFP1<sup>S2+/-;S4+/-</sup> double heterozygous mutant cells produced about 2%-2.5% of iPSCs. This  
312 difference can be explained by the levels of the OSKM transgenes that is much higher in SGFP1<sup>S2+/-</sup> cells  
313 than in NGFP<sup>N+/-</sup> cells (**Figure S4C**) as additional levels of OSK can rescue the phenotype of the double  
314 heterozygous mutant lines (**Figure S2E**). Taken together, these results suggest that the double  
315 heterozygous phenotype is not system nor gene- specific. This observation raises a real concern as to  
316 the KI/KO targeting approach when cellular state induction is studied.

317  
318 ***Reduced early stochastic expression of the targeted genes cannot explain the reprogramming***  
319 ***blockage seen in the double heterozygous mutant lines***

320 Stochastic expression of pluripotency genes during early stages of reprogramming was evident by  
321 multiple single-cell studies (Buganim et al., 2012; Buganim et al., 2013; Guo et al., 2019). Thus, we  
322 hypothesized that the lack of two key pluripotency alleles in the double heterozygous mutant cells might  
323 impair their ability to successfully pass the early stochastic phase, resulting in a blockage/delay in  
324 reprogramming. To explore this possibility, we generated tracing system for *Nanog* and *Sall4* as two  
325 representative genes out of the 5 targeted ones (i.e. *Nanog*, *Sall4*, *Utf1*, *Esrrb* and *Sox2*). We chose  
326 *Nanog* because it appears in most of our double heterozygous mutant lines and *Sall4* because it exhibits

327 the highest levels of stochastic expression at early phases of reprogramming compared to the other  
328 targeted genes (Buganim et al., 2012).

329 To that end, we targeted a *2A-EGFP-ERT-CRE-ERT* cassette into *Sall4* or *Nanog* locus using gRNA that is  
330 located at the 3' UTR of the gene. We targeted an ESC line (RL) that contains a lox-STOP-lox (L-S-L)  
331 cassette upstream to a tdTomato reporter gene and M2rtTA transactivator at the *Rosa26* locus (each  
332 cassette at different allele, **Figure 5A, 5B**). Upon *Sall4* or *Nanog* expression and the addition of  
333 tamoxifen, CRE recombinase is translocated to the nucleus and removes the L-S-L cassette, leading to  
334 irreversible activation of the tdTomato reporter. Given that both *Nanog* and *Sall4* are expressed in ESCs,  
335 transfected colonies were sorted based on EGFP expression and correct targeting was validated by PCR  
336 (**Figure 5C-D**). To assess the efficiency of the tracing system, correctly targeted ESC clones (i.e. RL8 for  
337 *Sall4* and RL9 for *Nanog*) were exposed to Tamoxifen (Tam) and the percentage of tdTomato-positive  
338 cells were scored under the microscope and by flow cytometry, demonstrating very high L-S-L cassette  
339 removal efficiency (**Figures 5E-F and S5A-D**).

340 The observation that NGFP2<sup>N+/-</sup> double heterozygous mutant induced cells could not activate the  
341 epithelial program (**Figure 3F and S3B**) suggests that the blockage in reprogramming in these cells is  
342 general and not restricted to the small fraction of cells that are destined to become iPSCs. Thus, in order  
343 to correlate the stochastic expression of the targeted alleles to the observed blockage/delay, most  
344 induced cells should show some activation of the targeted alleles at early time point of reprogramming.  
345 MEFs produced from *Sall4* and *Nanog* tracing ESC systems were transduced with OSKM cassette and  
346 tdTomato activation was assessed in the induced cells after 6 days and following 14 days of  
347 reprogramming followed by 3 days of dox removal. We chose day 6 since it is an early time point that  
348 exhibits high stochastic expression of pluripotency genes (Buganim et al., 2012; Buganim et al., 2013;  
349 Guo et al., 2019). However, only up to 0.24% of the *Sall4* tracing cells and up to 0.62% of *Nanog* tracing  
350 cells were tdTomato-positive at day 6 of reprogramming, ruling out the hypothesis that *Sall4* or *Nanog*  
351 stochastic expression early in the reprogramming process is responsible for the double heterozygous  
352 mutant phenotype (**Figure 5G-I, 5J-L**). 7.42% of *Sall4*-EGFP in conjunction with 7.96% of tdTomato-  
353 positive cells for the *Sall4* tracing system and 2.8% of *Nanog*-EGFP together with 6.7% of tdTomato-  
354 positive cells for the *Nanog* tracing system at the end of the reprogramming process confirmed  
355 successful reprogramming, refuting the possibility that the low percentage of tdTomato-positive cells  
356 observed at day 6 of reprogramming in the *Sall4* and *Nanog* tracing systems is due to low  
357 reprogramming efficiency (**Figure 5M-N**). In conclusion, this set of experiments, challenges the

358 hypothesis that reduced stochastic expression of the targeted pluripotent alleles is responsible for the  
359 early blockage seen in the double heterozygous mutant lines.

360

361 ***Methylation abnormalities in the double heterozygous mutant fibroblasts is correlated with***  
362 ***reprogramming impairment***

363 The fact that additional exogenous expression of OSK factors could rescue the delay seen in the double  
364 heterozygous mutant cells (**Figure S2E**), suggests that epigenetic abnormalities, rather than genetic  
365 modifications (i.e. the elimination of the targeted alleles themselves), are responsible for the observed  
366 blockage. This notion is also supported by the transcriptomic changes seen in the double heterozygous  
367 NGFP2<sup>N+/-</sup> iPSC mutant lines that grew under S/Lif condition, but not in 2i/Lif conditions, that force the  
368 naïve ground state (**Figure S2B-C**). As 2i/Lif conditions induce DNA hypomethylation (Sim et al., 2017),  
369 and since DNA methylation reshaping has been shown to be crucial for reprogramming (Buganim et al.,  
370 2013; De Carvalho et al., 2010) we hypothesized that the double heterozygous mutant fibroblasts might  
371 harbor abnormal DNA methylation that hinders their ability to undergo reprogramming. To test this  
372 hypothesis, MEFs derived from double heterozygous mutant SGFP1<sup>S2+/-;S4+/-</sup> iPSCs and from their parental  
373 SGFP1<sup>S2+/-</sup> iPSCs were subjected to methylation analyses using reduced representation bisulfite  
374 sequencing (RRBS) to capture the CpG-enriched methylation landscape of the cells as a representation  
375 for the global methylation changes.

376 RRBS analysis revealed that the two fibroblast lines are very similar in regard to their CpG-enriched  
377 methylation landscape, suggesting that overall the double heterozygous mutant line harbor a correct  
378 fibroblastic methylation landscape. However, read counts did vary between samples and so did reads-  
379 per-site, clustering them as two different groups (**Figure 6A**). We then searched for differentially  
380 methylated regions (DMRs) between the two fibroblast lines. DMRs were defined as CpG sites of  
381 consecutive tiles that are 100bp long in size, include at least 15 reads and show at least 20% methylation  
382 differences between the two fibroblast lines. All DMRs were adjusted to p-value of 1e-3 or lower. This  
383 analysis yielded two groups of DMRs: (i) 1263 tiles that are more methylated and (ii) 1384 tiles that are  
384 less methylated in the double heterozygous mutant line compared to control (**Figure 6B-C**). We then  
385 associated each DMR to its neighboring gene and ran GO term analysis using EnrichR (Xie et al., 2021).  
386 Interestingly, many of the differentially methylated *loci* were found to be associated with pluripotency  
387 and developmental pathways (**Figure 6D-E**). Specifically, dataset derived from loss of function  
388 experiments suggested that these genes are being upregulated in ESCs upon loss of function of *Oct4*,  
389 and are associated with the Hippo signaling (**Figure 6D-E**), suggesting that the loss of indicated two

390 pluripotency alleles hinders the capability of the core pluripotency circuitry to maintain normal DNA  
391 methylation of these *loci* later on in development.

392 To confirm that DNA methylation abnormalities is responsible for the reprogramming delay seen in the  
393 double heterozygous mutant lines we next employed the DNA hypomethylation agent, the 5-Aza-2'-  
394 deoxycytidine (5'azaDC). Double heterozygous mutant fibroblasts from all lines were treated for two  
395 days with 5'azaDC and reprogramming experiments were carried out by the addition of dox for 13 days  
396 followed by 3 days of dox removal. In agreement with the RRBS results, treatment of 5'azaDC for two  
397 days prior to dox addition rescued the reprogramming defect seen in the double heterozygous mutant  
398 lines (**Figure 6F**). These results suggest that reduced levels of pluripotency genes at the pluripotent state  
399 leads to methylation abnormalities later on in their somatic cell derivatives. Moreover, these data  
400 suggest that the KI/KO approach to introduce a reporter gene should be avoided to maintain normal  
401 epigenetic state in the cells.

402

## 403 DISCUSSION

404 Fluorescent reporter genes are a widely used tool in science to monitor the activity of a gene, regulatory  
405 element, non-coding RNA or other elements in the genome. One of the most common approach to  
406 introduce a reporter gene in a *locus-specific* manner is by the KI/KO approach. In this technique, the  
407 genomic sequence of the element of interest is being replaced by the coding sequence of the reporter  
408 gene, leaving only one intact allele of the targeted element. While this approach is considered harmless  
409 to the cells, up till now no thorough study has been conducted to support this claim. Here, by using  
410 pluripotent stem cells as a tested model we aimed to understand how allele elimination affects cell's  
411 function and potential. To increase our ability to detect abnormalities caused by the elimination of the  
412 targeted alleles we deleted a single allele from various combinations of two pluripotency genes (i.e.  
413 *Nanog*<sup>+/-</sup>;*Sall4*<sup>+/-</sup>, *Nanog*<sup>+/-</sup>;*Esrrb*<sup>+/-</sup>, *Nanog*<sup>+/-</sup>;*Utf1*<sup>+/-</sup>, *Sox2*<sup>+/-</sup>;*Sall4*<sup>+/-</sup>) and used different pluripotent stem  
414 cell systems to exclude any system-specific effect. Interestingly, while examination of the  
415 developmental potential of the cells did not reveal a significant difference between the double  
416 heterozygous mutant cells and their parental controls, fibroblasts derived from these double  
417 heterozygous mutant pluripotent cells, demonstrated a strong blockage in their capability to induce  
418 pluripotency either by transcription factors or by nuclear transfer. The poor reprogramming efficiency  
419 observed between the various pluripotent stem cell systems ranged from a complete blockage at the  
420 mesenchymal to epithelial (MET) transition (NGFP2 line) to a later blockage at the stabilization step just  
421 before the acquisition of pluripotency (NGFP1 and SGFP1 lines, data not shown). Given that the affected  
422 genes were shown to play a major role during the stochastic phase of the reprogramming process  
423 (Buganim et al., 2012; Guo et al., 2019; Morshedi et al., 2013), we next examined the possibility that  
424 reduced stochastic expression of the targeted genes hinders the capability of the cells to pass the  
425 stochastic phase and to induce pluripotency. As the blockage seen in the double heterozygous mutant  
426 cells happened in the vast majority of the induced cells, to support the claim that reduced stochastic  
427 expression is responsible to the observed blockage, we aimed to show that the activation of the *Sall4* or  
428 *Nanog* allele is a frequent event and occurred in most induced cells at early stages of reprogramming. To  
429 test this hypothesis, we generated a tracing system for *Nanog* and *Sall4* that is based on the activity of  
430 Cre recombinase that unleashes an irreversible activation of a tdTomato reporter gene once activated.  
431 However, only a small number of induced cells turned on the tdTomato reporter following six days of  
432 factor induction, suggesting that reduced stochastic expression of these genes is not responsible for the  
433 global reprogramming delay seen in the double heterozygous mutant cells.



434 Additional expression of multiple pluripotent factors (e.g. *Sall4*, *Nanog*, *Utf1*, *Esrrb*, OSK) can either  
435 partially or fully rescue the observed blockage, thus, we next hypothesized that epigenetic barrier in the  
436 double heterozygous mutant fibroblasts, but not the allele elimination itself, may cause the observed  
437 delay. To that end, we subjected the parental and its double heterozygous mutant fibroblast  
438 counterparts to CpG-enriched DNA methylation analysis. A clear difference in the DNA methylation  
439 levels in regions within pluripotent and developmental genes was noted between the two fibroblast  
440 lines, suggesting that even a 50% reduction in the levels of two pluripotent genes is sufficient to induce  
441 aberrant DNA methylation during development. In fact, although *Oct4* expression level was not affected  
442 in the iPSCs, GEO enrichment of the derived MEFs showed loss of function of *Oct4* as a core pluripotency  
443 player which can be explained by the fact that key pluripotent genes such as *Nanog*, *Sox2*, *Sall4* and  
444 *Esrrb* who have been shown to regulate and function with the core DNA methylation machinery were  
445 missing (Adachi et al., 2018; Shanak and Helms, 2020; Tan et al., 2013).

446 The KI/KO approach is a well-accepted technique to introduce a reporter gene, however, there are other  
447 methodologies to introduce a reporter gene into a gene of interest without eliminating the gene's  
448 coding sequences. This includes the use of self-cleavage peptides such as 2A and the internal ribosome  
449 entry site (IRES). Nevertheless, even in these, relatively safe techniques, in many occasions, a robust  
450 degradation of the targeted allele is still observed due to destabilization of the targeted mRNA following  
451 the introduction of the reporter cassette itself (Benchetrit et al., 2019). Overall, our study suggest that  
452 the KI/KO approach should be used carefully when cell state establishment is studied and emphasizes  
453 the importance of having two intact alleles for proper cellular functioning.

## 454 **Material and Methods**

### 455 **Cell culture**

456 Mouse embryonic fibroblasts (MEFs) were isolated as previously described (Wernig et al., 2008). MEFs  
457 were grown in DMEM supplemented with 10% fetal bovine serum, 1% non-essential amino acids, 2 mM  
458 L-Glutamine and antibiotics. ESCs and iPSCs were grown in S/Lif medium or 2i/Lif: DMEM supplemented  
459 with 10% fetal bovine serum, 1% non-essential amino acids, 2 mM L-Glutamine, 2X106 units mLif,  
460 0.1 mM  $\beta$ -mercaptoethanol (Sigma) and antibiotics with or without 2i- PD0325901 (1 mM) and  
461 CHIR99021 (3 mM) (PeproTech). All the cells were maintained in a humidified incubator at 37°C and 6%  
462 CO<sub>2</sub>. All infections were performed on MEFs (passage 0-2) that were seeded at 50-70% confluency two  
463 days before the first infection. During the reprogramming to iPSC, the cells were grown in S/Lif medium  
464 with the addition of 2  $\mu$ g/ml doxycycline.

465

### 466 **Secondary MEF production**

467 Briefly, iPSC lines (NGFP2, NGFP1 and SGFP1 lines) were injected into blastocysts and chimeric embryos  
468 were isolated at E13.5. For MEF production, embryos were dissected under the binocular removing  
469 internal organs and heads. The remaining body was chopped thoroughly by scalpels and exposed to 1ml  
470 Trypsin-EDTA (0.25%, GIBCO) for 30 minutes at 37°C. Following that, 10 mL of DMEM medium containing  
471 10%FBS was added to the plate and the chopped tissue was subjected to thorough and intensive  
472 pipetting resulting in a relatively homogeneous mix of cells. Each chopped embryo was seeded in 15cm  
473 plate and cells were cultured in DMEM supplemented with 10%FBS, 2mM L-glutamine, and antibiotics  
474 until the plate was full. Puromycin (2  $\mu$ g/ml) was added to each 15cm plate for positive selection for  
475 NGFP2, NGFP1 and SGFP1 MEFs, eliminating only the host cells.

476

### 477 **Immunostaining and Western blot**

478 Cells were fixed in 4% paraformaldehyde (in PBS) for 20 minutes. The cells were rinsed 3 times with PBS  
479 and blocked for 1hr with PBS containing 0.1% Triton X-100 and 5% FBS. The cells were incubated  
480 overnight with primary antibodies (1:200) in 4C. The antibodies are: anti-SALL4 (Abcam, ab29112) and  
481 anti-NANOG (Bethyl, A300-379A) in PBS containing 0.1% Triton X-100 and 1%FBS (1:200 dilution). The  
482 next day, the cells were washed 3 times and incubated for 1hr with relevant (Alexa) secondary antibody  
483 in PBS containing 0.1% Triton X-100 and 1% FBS (1:500 dilution). DAPI (1:1000 dilution) was added 10  
484 minutes before the end of incubation. For western blot, cell pellets were lysed on ice in lysis buffer (20  
485 mM Tris-HCl, pH 8, 1mM EDTA pH 8, 0.5% Nonidet P-40, 150mM NaCl, 10% glycerol, 1mM, protease

486 inhibitors (Roche Diagnostics) for 10 min, supernatant were collected and 40µg protein were suspended  
487 with sample buffer and boiled for or 5 min at 100C, and subjected to western blot analysis. Primary  
488 antibodies: anti-SALL4 (Abcam, ab29112), anti-NANOG (Bethyl, A300-379A), anti-ESRRB (Perseus  
489 proteomics, PP-H6705-00), anti-UTF1 (Abcam, ab24273), anti-Actin (Santa cruz, sc-1616), anti-β-Tubulin  
490 (Abcam, ab179513), anti-Vinculin (Abcam, ab129002). Blots were probed with anti-mouse, anti-goat or  
491 anti-rabbit IgG-HRP secondary antibody (1:10,000) and visualized using ECL detection kit.

492

#### 493 **Southern Blot**

494 Southern blot was performed as previously described (Carey et al., 2011).

495

#### 496 **FACS analysis**

497 Cells were washed twice with PBS and trypsinized (0.25%) and filtered through mesh paper. Flow  
498 cytometry analysis was performed on a Beckman Coulter and analyzed using Kaluza Software. All FACS  
499 experiments were repeated at least three times, and the bar graph results are presented as a mean ±  
500 standard deviation of two biological duplicate from a typical experiment. Flow cytometry analysis was  
501 performed on a Beckman Coulter and analyzed using Kaluza Software.

502

#### 503 **Quantitative real-time PCR**

504 Total RNA was isolated using the Macherey-Nagel kit (Ornat). 500–2000 ng of total RNA was reverse  
505 transcribed using iScript cDNA Synthesis kit (Bio-Rad). Quantitative PCR analysis was performed in  
506 duplicates using 1/100 of the reverse transcription reaction in a StepOnePlus (Applied Biosystems) with  
507 SYBR green Fast qPCR Mix (Applied Biosystems). Specific primers flanking an intron were designed for  
508 the different genes (see Primer Table). All quantitative real-time PCR experiments were repeated at  
509 least three times, and the results were normalized to the expression of *Gapdh* and presented as a mean  
510 ± standard deviation of two duplicate runs from a typical experiment.

511

#### 512 **RNA sequencing**

513 Total RNA was isolated using Rneasy Kit (QIAGEN) and sent to the “Technion Genome Center”, Israel, for  
514 library preparation and sequencing.

515

#### 516 **Cleaning and filtering of raw reads**

517 Raw reads (fastq files) were inspected for quality issues with FastQC (v0.11.2,  
518 <http://www.bioinformatics.babraham.ac.uk/projects/fastqc/>). According to the FastQC report, reads  
519 were then trimmed to a length of 50 bases with fastx\_trimmer of the FASTX package (version 0.0.13,  
520 [http://hannonlab.cshl.edu/fastx\\_toolkit/](http://hannonlab.cshl.edu/fastx_toolkit/)), and quality-trimmed at both ends, using in-house perl scripts,  
521 with a quality threshold of 32. In short, the scripts use a sliding window of 5 base pairs from the read's  
522 end and trim one base at a time until the average quality of the window passes the given threshold.  
523 Following quality-trimming, adapter sequences were removed by Trim Galore (version 0.3.7,  
524 [http://www.bioinformatics.babraham.ac.uk/projects/trim\\_galore/](http://www.bioinformatics.babraham.ac.uk/projects/trim_galore/)), using the command "trim\_galore -a  
525 \$adseq -length 15" where \$adseq is the appropriate adapter sequence. The remaining reads were  
526 further filtered to remove very low-quality reads, using the fastq\_quality\_filter program of the FASTX  
527 package, with a quality threshold of 20 at 90 percent or more of the read's positions.

528

### 529 **Expression analysis**

530 The cleaned fastq files were mapped to the mouse transcriptome and genome, Ensembl version  
531 GRCm38 from Illumina's iGenomes  
532 ([http://support.illumina.com/sequencing/sequencing\\_software/igenome.html](http://support.illumina.com/sequencing/sequencing_software/igenome.html)), using TopHat (v2.0.11),  
533 allowing up to 3 mismatches and a total edit distance of 8 (full command: tophat -G  
534 Mus\_musculus/Ensembl/GRCm38/Annotation/Genes/genes.gtf -N 3 --read-gap-length 5 --read-edit-dist  
535 8 --segment-length 18 --read-realign-edit-dist 5 --b2-i S,1,0.75 --b2-mp 3,1 --b2-score-min L,-0.5,-0.5  
536 Mus\_musculus/Ensembl/GRCm38/Sequence/Bowtie2Index/genome\_clean.fastq). Quantification and  
537 normalization were done with the Cufflinks package (v2.2.1). Quantification was done with cuffquant,  
538 using the genome bias correction (-b parameter), multi-mapped reads assignment algorithm (-u  
539 parameter) and masking for genes of type IG, TR, pseudo, rRNA, tRNA, miRNA, snRNA and snoRNA (-M  
540 parameter). Normalization was done with cuffnorm (using output format of Cuffdiff).

541

### 542 **Visualization**

543 The R package cummeRbund (version 2.8.2) was used to calculate and draw the figures (such as scatter  
544 plots, MA plots, etc.) from the normalized expression values.

545

### 546 **Chimera Formation**

547 Blastocyst injections were performed using (C57/Bl6xDBA) B6D2F2 or CB6F1 host embryos. All injected  
548 iPSC lines were derived from crosses of 129Sv/Jae to C57/Bl6 mice and could be identified by agouti coat

549 color. Embryos were obtained 24 hr (1 cell stage) or 40 hr (2 cell stage) posthuman chorionic  
550 gonadotropin (hCG) hormone priming. Diploid embryos were cultured in EmbryoMax KSOM (Millipore)  
551 or Evolve KSOMaa (Zenith Biotech) until they formed blastocysts (94–98 hr after hCG injection) at which  
552 point they were placed in a drop of Evolve w/HEPES KSOMaa (Zenith) medium under mineral oil. A flat  
553 tip microinjection pipette with an internal diameter of 16  $\mu$ m (Origio) was used for iPSC injections. Each  
554 blastocyst received 8–12 iPSCs. Shortly after injection, blastocysts were transferred to day 2.5 recipient  
555 CD1 females (20 blastocysts per female). Pups, when not born naturally, were recovered at day 19.5 by  
556 cesarean section and fostered to lactating Balb/c mothers.

557

### 558 **Nuclear transfer**

559 Nuclear transfer was performed as described (Wakayama et al., 1998) with modifications. Briefly,  
560 metaphase II-arrested oocytes were collected from superovulated B6D2F1 females (8-10 wks) and  
561 cumulus cells were removed using hyaluronidase. The oocytes were enucleated in a droplet of HEPES-  
562 CZB medium containing 5 $\mu$ g/ml cytochalasin B (CB) using a blunt Piezo-driven pipette. After enucleation,  
563 the spindle-free oocytes were washed extensively and maintained in CZB medium up to 2 h before  
564 nucleus injection. The CCs from mice (B6D2F1) were aspirated in and out of the injection pipette to  
565 remove the cytoplasmic material and then injected into enucleated oocytes. The reconstructed oocytes  
566 were cultured  
567 in CZB medium for 1 h and then activated for 5-6 h in activation medium containing 10mM Sr<sup>2+</sup>, 5ng/ml  
568 trichostatin A (TSA) and 5 $\mu$ g/ml CB. Following activation, all of the re constructed embryos were  
569 cultured in KSOM medium supplemented with 5ng/ml TSA for another 3-4 hours and maintained in  
570 KSOM medium with amino acids at 37°C under 5% CO<sub>2</sub> in air.

571

### 572 **Reduced-representation bisulfite sequencing (RRBS)**

573 DNA was isolated from MEFs and incubated in lysis buffer (25mM Tris-HCl (pH8), 2mM  
574 ethylenediaminetetraacetic acid, 0.2% sodium dodecyl sulfate, 200mM NaCl) supplemented with  
575 300 $\mu$ g/mL proteinase K (Roche) followed by phenol:chloroform extraction and ethanol precipitation  
576 and RRBS libraries were prepared (Boyle et al., 2012) and run on HiSeq 2500 (Illumina) using 100bp  
577 paired-end sequencing.

578 DNA methylation was analyzed by using 100bp paired-end sequencing reads from RRBS that were  
579 trimmed and quality filtered by trim galore software using default parameters for RRBS. Read alignment  
580 (genome build mm10) and extraction of single-base resolution methylation levels were carried out by

581 BSMAP. Differentially methylated regions (DMR) were explored with R methylKit package version 1.18.0  
582 (Akalin et al., 2012). CpG sites featuring less than 10 reads were considered unreliable and discarded  
583 from further analysis. CpG sites were then aggregated into consecutive tiles of size 100 bp and a  
584 threshold of at least 15 reads per tile was applied. Differential methylation between the two lines, each  
585 consisting of three samples, was determined by logistic regression and adjusted p-values are calculated  
586 with SLIM (sliding linear model). A threshold of 1E-3 was set for adjusted p-value and a threshold of 20  
587 methylation points was set between the two lines and further explored. DMRs were annotated with  
588 Homer (Hypergeometric Optimization of Motif Enrichment) version 4.11.1 (Heinz et al., 2010) and  
589 specifically its function annotatePeaks.pl. This function outputs a set of genes affiliated with DMR based  
590 on the nearest promoter distance. Heatmaps were created with R package heatmap.2 version 3.1.1 and  
591 dendrogram with R package dendextend version 1.15.2 (Galili, 2015).

592

593 **ACKNOWLEDGEMENTS**

594 Y.B. is supported by research grants from EMBO Young Investigator Programme (YIP), DKFZ-MOST (CA  
595 177), Howard Hughes Medical Institute International Research Scholar (HHMI, #55008727) and by a  
596 generous gift from Ms. Nadia Guth Biasini. We thank Yuval Nevo and huji core bioinformatics unit for  
597 analyzing part of the RNA-seq data.

598

599 **Author Information**

600 RNA-seq data for the various NGFP2<sup>N+/-</sup> double heterozygous mutant and control iPSC lines (accession  
601 number GSE182009) and RNA-seq for NGFP2<sup>N+/-</sup> double heterozygous mutant and control MEF lines  
602 after 6 days of reprogramming and RRBS for the SGFP1<sup>S2+/-</sup> and SGFP1<sup>S2+/-;S4+/-</sup> primary MEFs (accession  
603 number GSE192655) has been deposited to the Gene Expression Omnibus database (GEO). The  
604 reviewers can enter the deposited data using the following token: wxcbcokaplurhsn. Correspondence  
605 and requests for materials should be addressed to Y.B. ([yossib@ekmd.huji.ac.il](mailto:yossib@ekmd.huji.ac.il)).

606

607 **Author Contribution**

608 Y.B. and R.J. conceived the study. Y.B., R.L. designed the experiments, prepared the figures and wrote  
609 the manuscript. Y.B. together with E.K., C.O., and D.F. generated the NGFP2<sup>N+/-</sup> double heterozygous  
610 mutant lines and ran the various reprogramming experiments on NGFP2<sup>N+/-</sup> lines. R.L. generated the  
611 tracing systems, with the help of N.M. for Nanog and Sall4 and the NGFP1<sup>N+/-;S+/-</sup>, NGFP1<sup>N-/-</sup> and SGFP1<sup>N+/-</sup>  
612 <sup>S4+/-</sup> lines, performed reprogramming experiments on these lines, immunostaining, flow cytometry and  
613 5'azaDC experiments. N.M. prepared the samples for the RNA-seq at day 6 of reprogramming and  
614 performed qPCR for the MET genes. N.M. together with N.YT. ran rescue reprogramming experiments  
615 and performed sm-mRNA-FISH. A.W.C. analyzed the RNA-seq data from the various NGFP2<sup>N+/-</sup> iPSC lines.  
616 H.Y. performed SCNT experiments. S.M. and K.M. injected iPSC lines to produce secondary MEFs and  
617 chimeric mice. M.A. helped R.L. to run reprogramming experiments and to analyze the flow cytometry  
618 results.

Figure 1

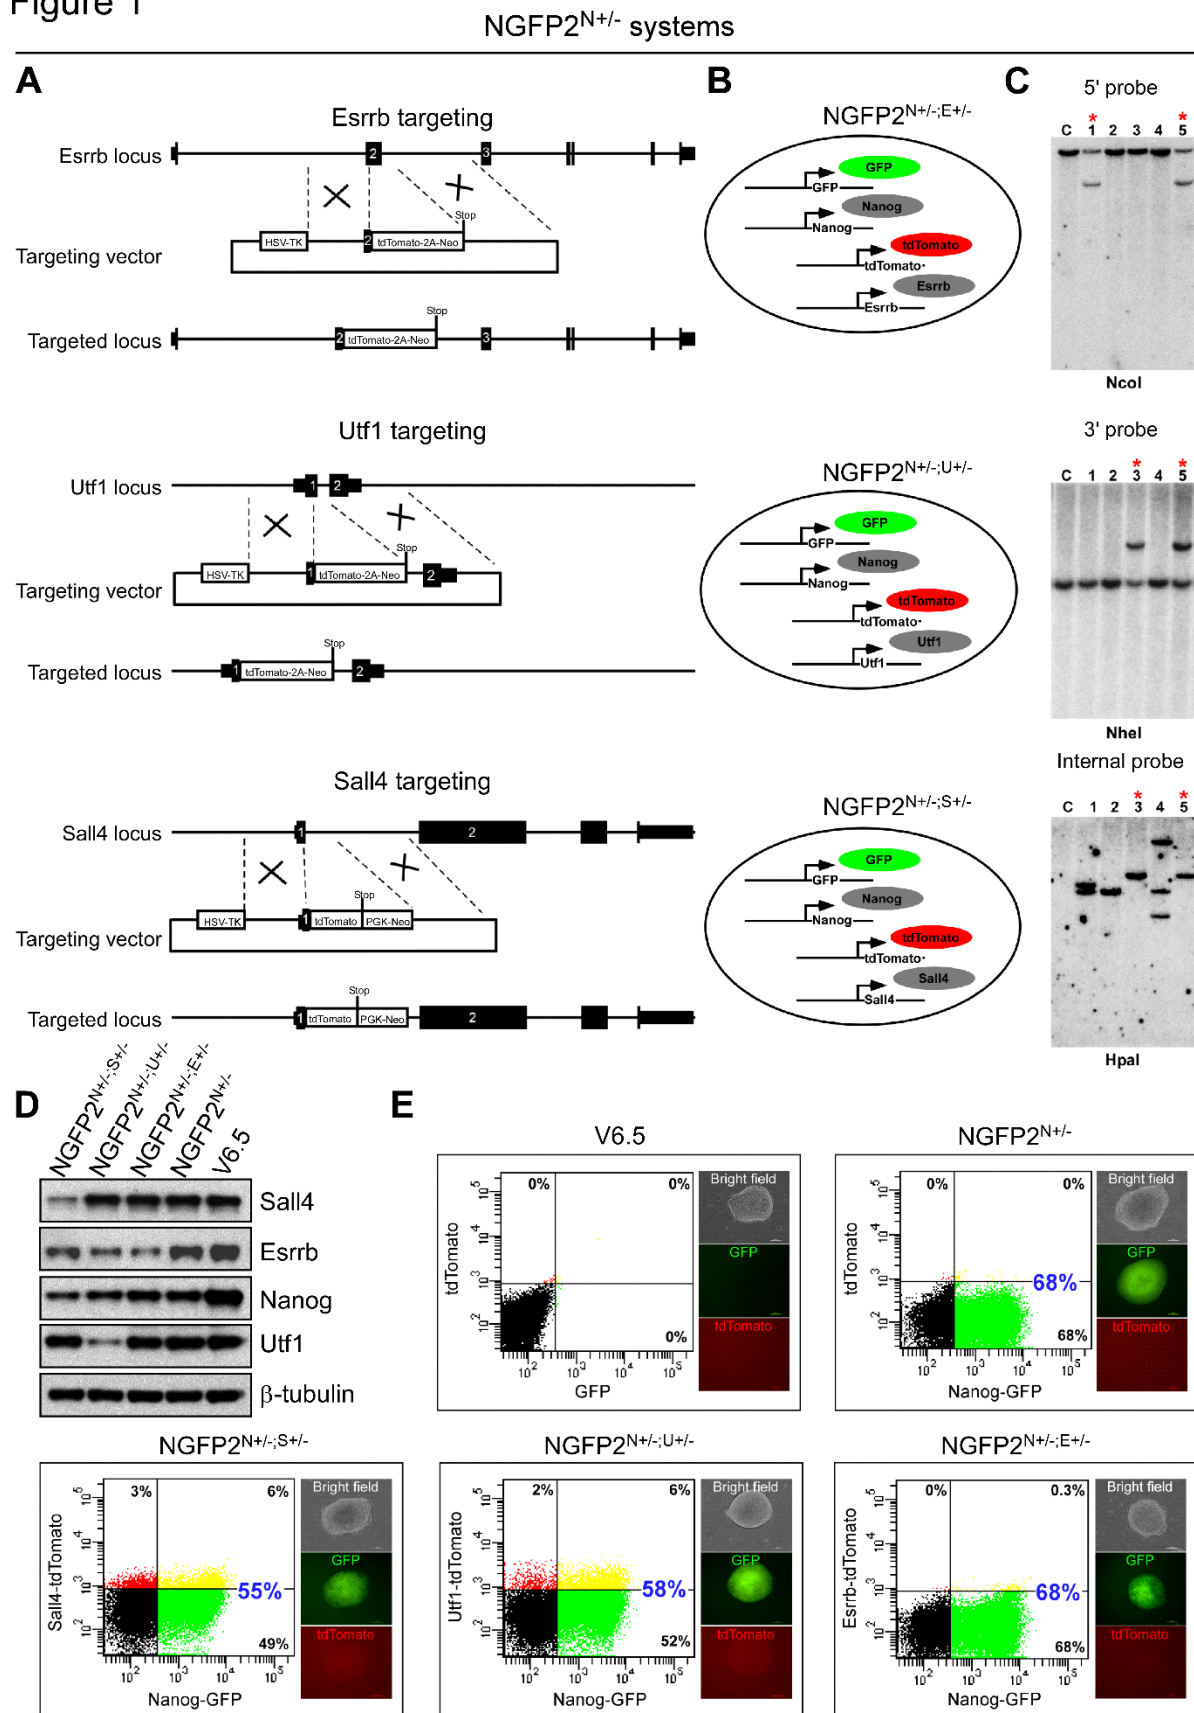

619



620 **Figure 1. Generation of double heterozygous mutant NGFP2<sup>N+/-</sup> iPSC lines. (A, B)** Schematic  
621 representation of the KI/KO targeting strategy for replacing one allele of *Esrrb*, *Utf1* or *Sall4* with a  
622 tdTomato reporter in NGFP2<sup>N+/-</sup> line. **(C)** Southern blot analysis for NGFP2<sup>N+/-</sup> targeted iPSC clones  
623 demonstrating heterozygous targeting for *Esrrb*, *Utf1* and *Sall4*. Correctly targeted clones are marked by  
624 red asterisks. **(D)** Western blot analysis demonstrating a reduction of ~50% of the protein levels of the  
625 targeted gene (*Esrrb*, *Utf1*, *Nanog* and *Sall4*) compared to ESC (V6.5) control. Cells were grown in 2i  
626 condition to facilitate expression from both alleles. **(E)** Flow cytometry analysis for GFP (*Nanog*) and  
627 tdTomato (*Utf1*, *Esrrb* or *Sall4*) in the various double heterozygous mutant lines that grew under S/Lif  
628 conditions. Note that while cells express the GFP reporter due to functional polyA signal, tdTomato is  
629 hardly detectable due to the absence of polyA. Similar to the western blot (D) GFP expression is reduced  
630 even further in NGFP2<sup>N+/-;U+/-</sup> and NGFP2<sup>N+/-;S+/-</sup> compared to NGFP2<sup>N+/-;E+/-</sup> and the parental cells  
631 NGFP2<sup>N+/-</sup>.

Figure 2

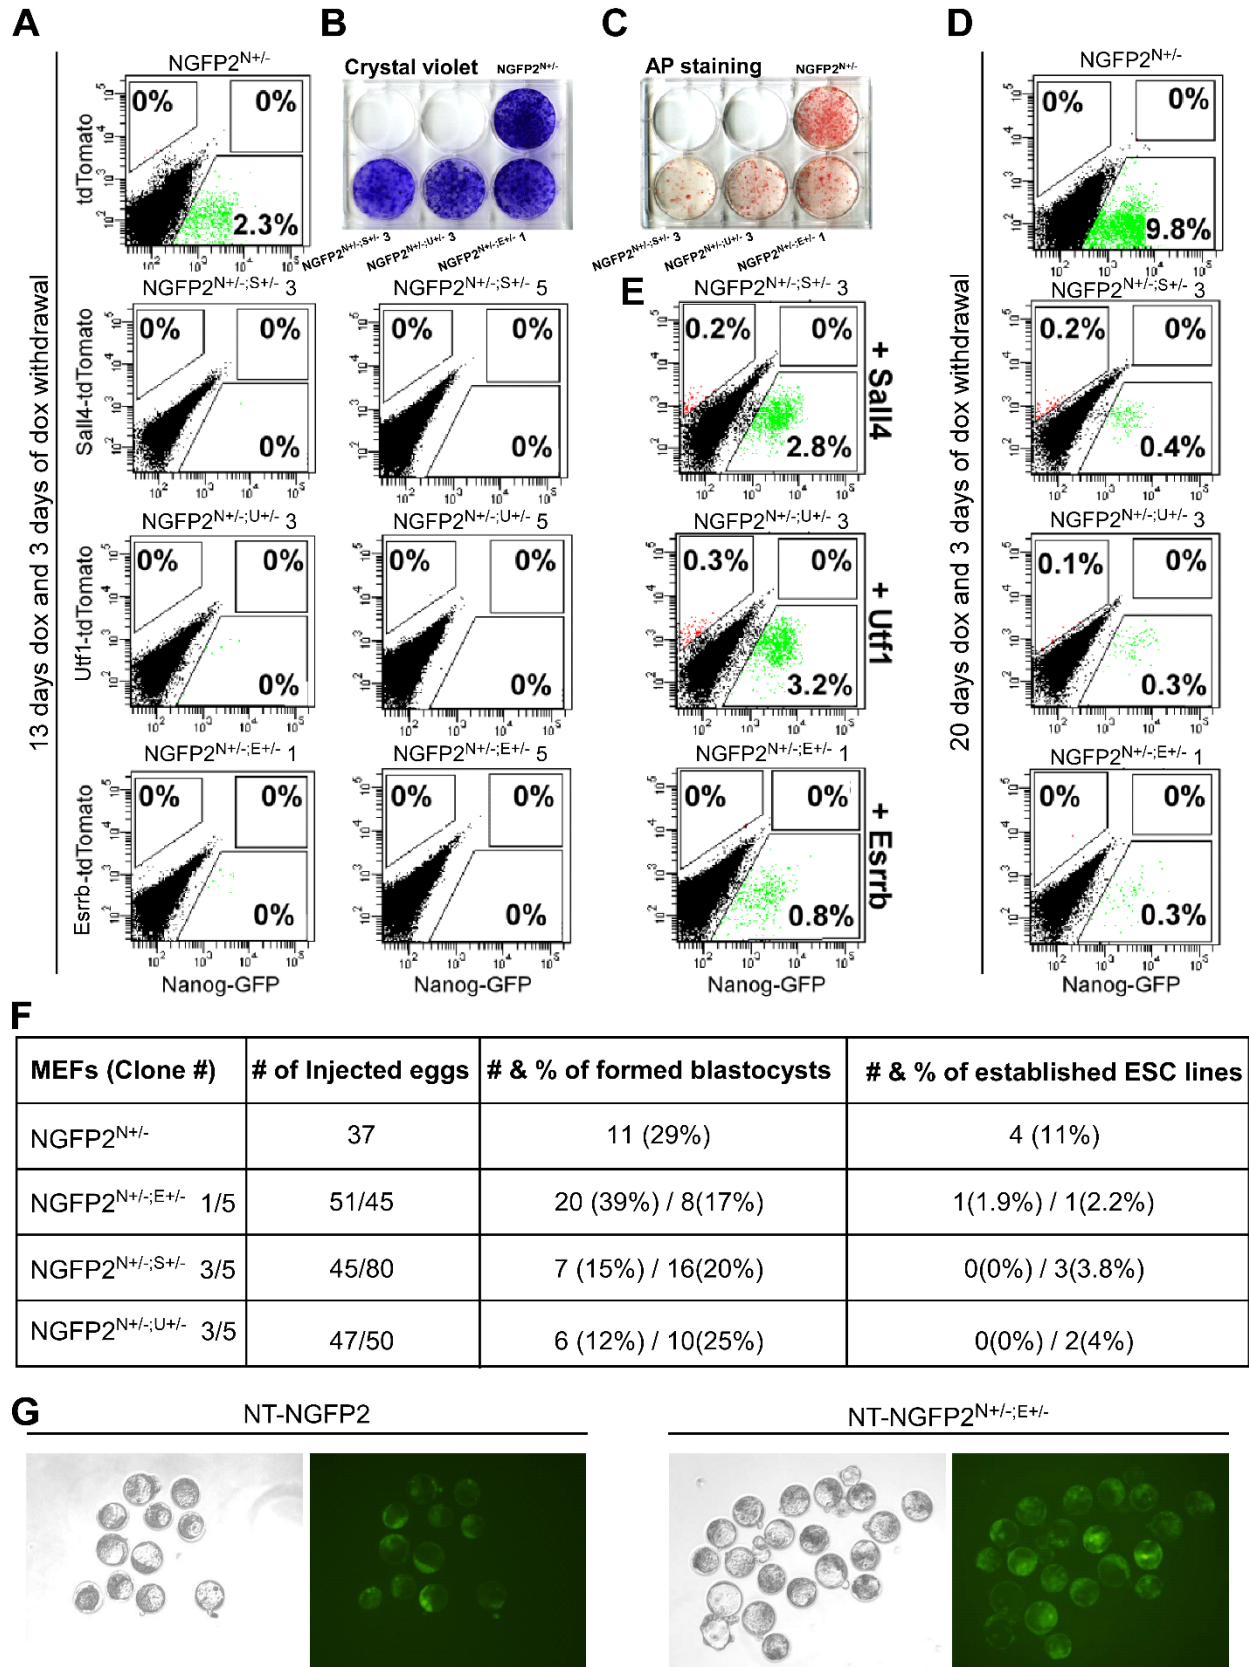

633 **Figure 2. NGFP2<sup>N+/-</sup> double heterozygous mutant MEFs show strong reprogramming inhibition either**  
634 **by OSKM or by somatic cell nuclear transfer (SCNT). (A)** Flow cytometry analysis of Nanog-GFP and  
635 tdTomato-positive cells for two different clones from each of the NGFP2 double heterozygous mutant  
636 MEFs and control following 13 days of dox exposure following by 3 days of dox withdrawal. **(B)** Crystal  
637 violet staining of whole reprogramming plate for each of the double heterozygous mutant MEF line and  
638 control at the end of the reprogramming process **(C)** Alkaline phosphatase staining of whole  
639 reprogramming plate of each of the double heterozygous mutant MEF line and control at the end of the  
640 reprogramming process. **(D)** Flow cytometry analysis of Nanog-GFP and tdTomato-positive cells for each  
641 of the NGFP2<sup>N+/-</sup> double heterozygous mutant MEFs and control following 20 days of dox exposure  
642 following by 3 days of dox withdrawal. **(E)** Flow cytometry analysis of Nanog-GFP and tdTomato-positive  
643 cells of each of the NGFP2<sup>N+/-</sup> double heterozygous mutant MEFs and control following overexpression of  
644 the targeted gene (*Sall4*, *Utf1* and *Esrrb*) and reprogramming process of 13 days and 3 days of dox  
645 withdrawal. **(F)** Table summarizing the efficiency (i.e. blastocyst formation and ESC derivation) of the  
646 somatic cell nuclear transfer (SCNT) process of MEF nuclei of the different double heterozygous mutant  
647 NGFP2<sup>N+/-</sup> lines. **(G)** Representative bright field and green channel images of NGFP2<sup>N+/-</sup> and NGFP2<sup>N+/-;E+/-</sup>  
648 following SCNT. Note that both cell lines produced Nanog-GFP-positive blastocysts.

Figure 3

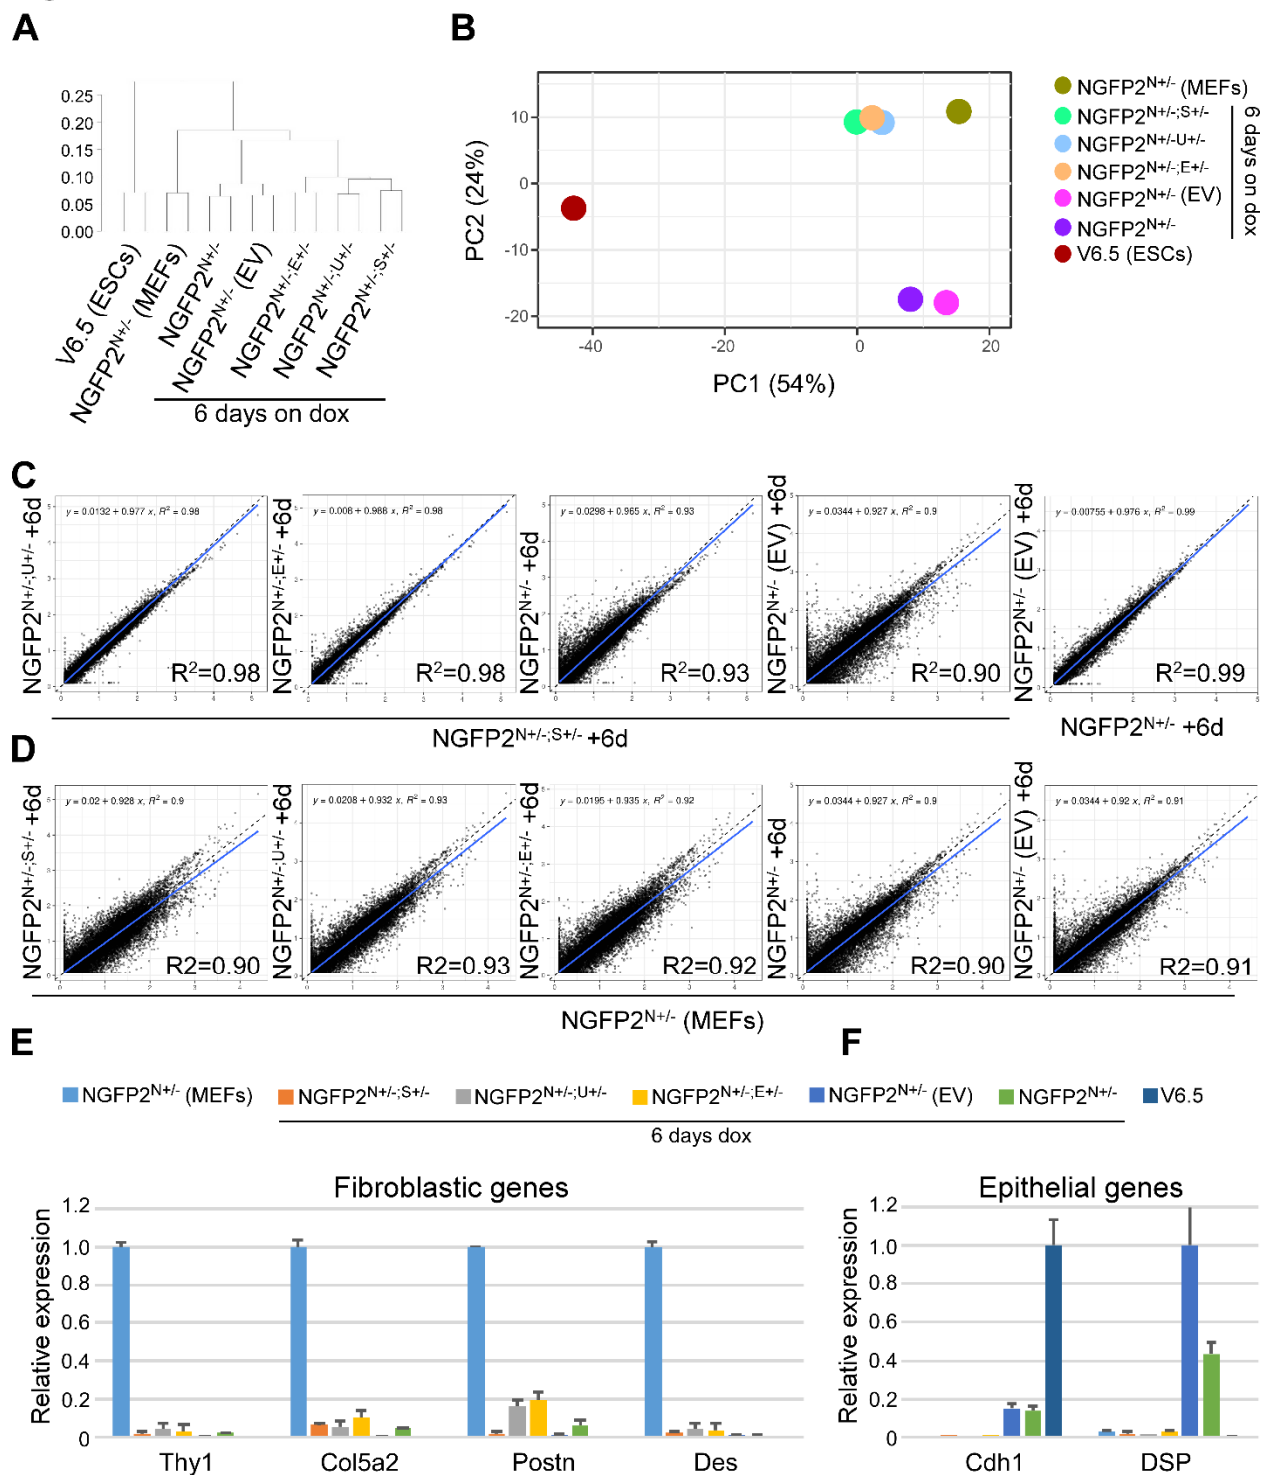

649  
650

651 **Figure 3. Unbiased comparative transcriptome analyses after 6 Days of dox clusters NGFP2<sup>N+/-</sup> double**  
652 **heterozygote lines far from NGFP2<sup>N+/-</sup> control. (A)** Hierarchical clustering of global gene expression  
653 profiles for two RNA-seq replicates for NGFP2<sup>N+/-</sup> iPSCs, NGFP2<sup>N+/-</sup> MEFs and NGFP2<sup>N+/-</sup>, NGFP2<sup>N+/-</sup> (EV)  
654 and the various NGFP2<sup>N+/-</sup> double heterozygous mutant lines (NGFP2<sup>N+/-; E+/-</sup>, NGFP2<sup>N+/-; U+/-</sup> and NGFP2<sup>N+/-;</sup>  
655 <sup>S4+/-</sup>) after 6 days of reprogramming. Replicate pairs were assigned a shared numerical value. **(B)**  
656 Principle component analysis for genes from (A). PC1, 54%; PC2, 24%. Each line is marked by a specific  
657 color. The group names correspond to the names in (A). **(C, D)** Scatter plots comparing gene expression  
658 between the indicated NGFP2<sup>N+/-</sup> lines after 6 days of dox and controls. Blue line shows the linear  
659 representation of the data, black line shows the y = x line. **(E, F)** qPCR of the indicated fibroblastic genes  
660 (E) and epithelial genes (F) in NGFP2<sup>N+/-</sup> and the different NGFP2<sup>N+/-</sup> double heterozygous mutant lines  
661 after 6 days of dox, MEFs and V6.5 ESCs controls. mRNA levels were normalized to the housekeeping  
662 control gene *Gapdh*. Error bars presented as a mean ± SD of 2 duplicate runs from a typical experiment  
663 out of 3 independent experiments.

Figure 4

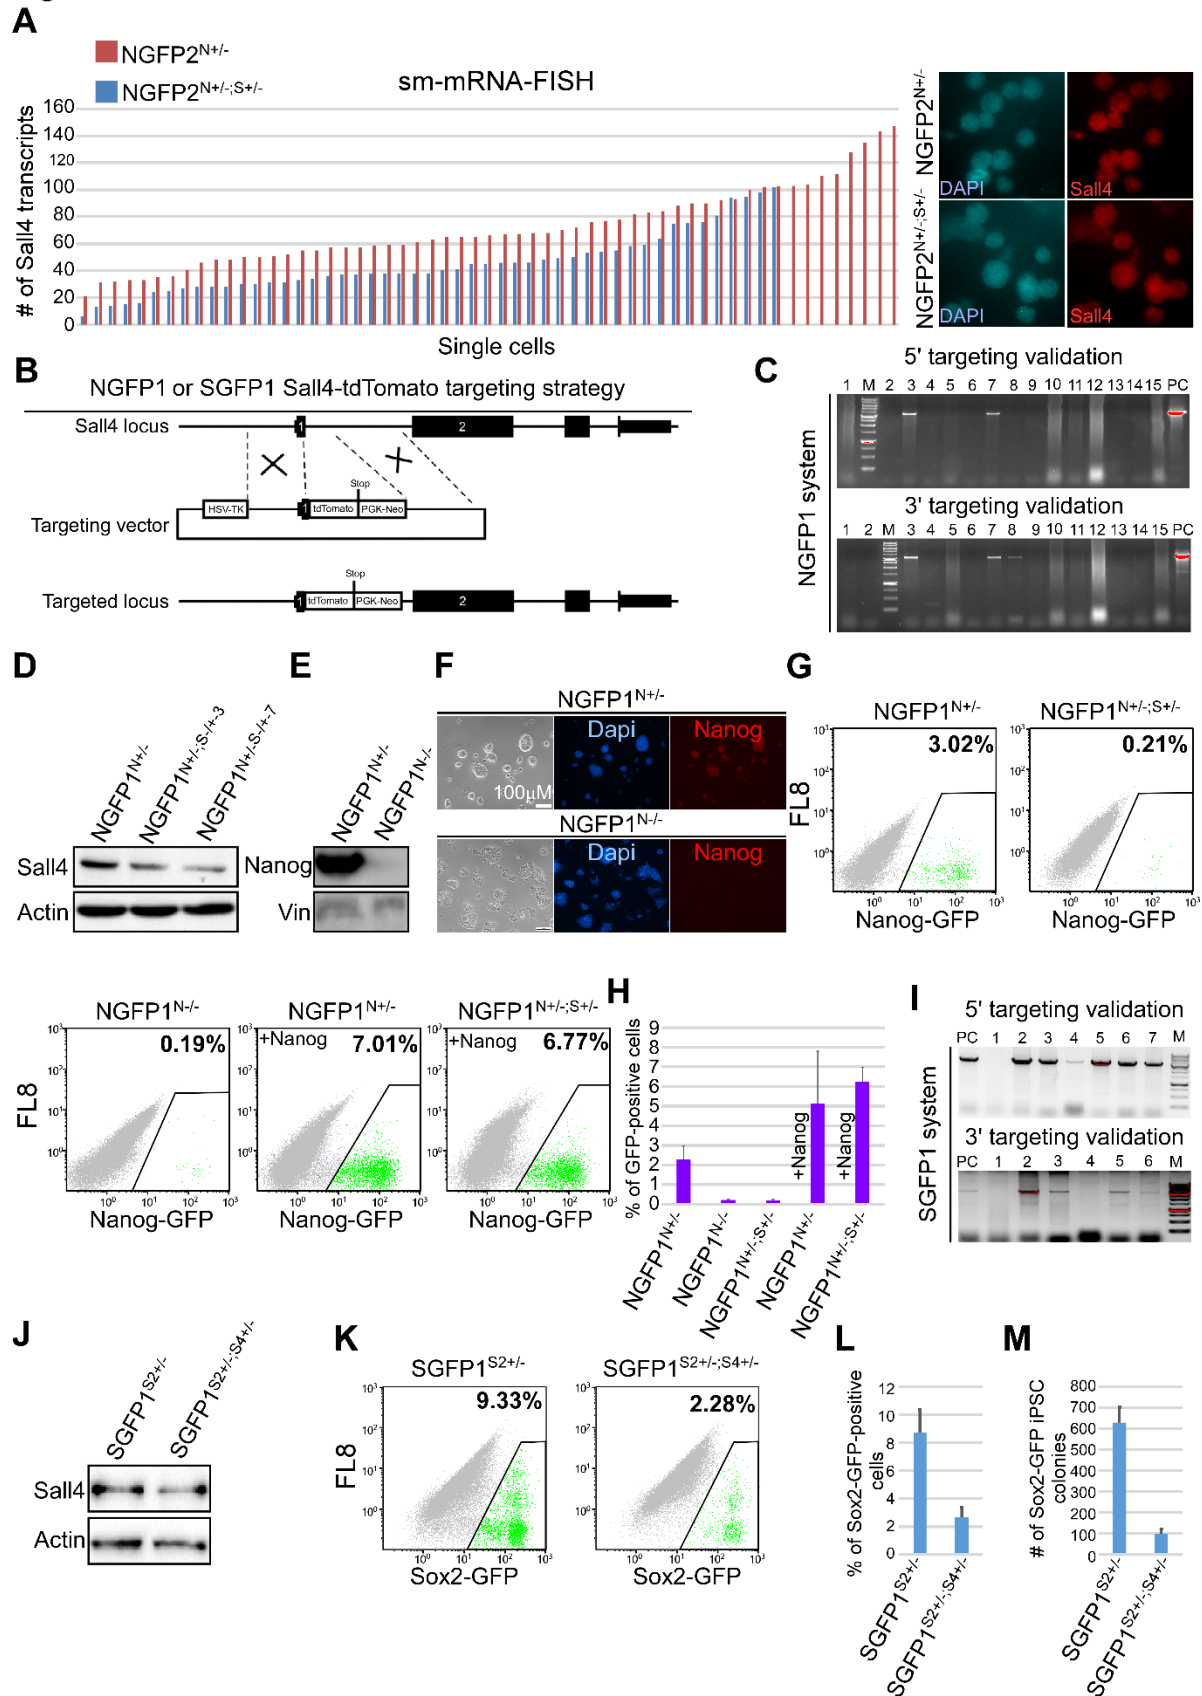

665 **Figure 4. NGFP1<sup>N+/-</sup> double heterozygous mutant MEFs and Nanog KO MEFs show strong**  
666 **reprogramming inhibition. (A)** Sm-mRNA-FISH directed towards *Sall4* transcripts in NGFP2<sup>N+/-</sup> and  
667 NGFP2<sup>N+/-;S+/-</sup> single iPSCs. **(B)** Schematic representation of the KI/KO targeting strategy for replacing one  
668 allele of *Sall4* with a tdTomato reporter in NGFP1<sup>N+/-</sup> and SGFP1<sup>S2+/-;S4+/-</sup> respectively. **(C)** PCR analysis for  
669 NGFP1<sup>N+/-</sup> targeted iPSC clones demonstrating correctly targeted clones for one allele of *Sall4*. Correctly  
670 targeted clones were verified using primers amplifying regions at the 5' and 3' end of the targeted *locus*.  
671 **(D)** Western blot analysis demonstrating a reduction of ~50% of the protein levels of *Sall4* compared to  
672 parental NGFP1<sup>N+/-</sup> control. **(E, F)** NGFP1<sup>N+/-</sup> parental iPSCs were transfected with CRISPR/Cas9 and gRNA  
673 against *Nanog* to produce *Nanog* KO NGFP1<sup>N+/-</sup> line. Western blot analysis (E) and immunostaining (F)  
674 demonstrating a complete KO of *Nanog* compared to parental NGFP1<sup>N+/-</sup> control. **(G)** Flow cytometry  
675 analysis of Nanog-GFP-positive cells in NGFP1<sup>N+/-</sup> control cells, NGFP1<sup>N+/-;S+/-</sup>, NGFP1<sup>N+/-</sup> and following  
676 overexpression of *Nanog* in rescue experiments after 13 days of reprogramming following by 3 days of  
677 dox withdrawal. **(H)** Comparative percentage of Nanog-GFP-positive cells for NGFP1<sup>N+/-</sup>, NGFP1<sup>N+/-;S+/-</sup>,  
678 NGFP1<sup>N+/-</sup>, NGFP1<sup>N+/-</sup> (+*Nanog* OE) and NGFP1<sup>N+/-;S4+/-</sup> (+*Nanog* OE) following reprogramming with OSKM  
679 (13 days of dox + 3 days dox withdrawal). **(I)** PCR validation for SGFP1<sup>S2+/-;S4+/-</sup> clones. **(J)** Western blot  
680 analysis detecting *Sall4* in SGFP1<sup>S2+/-</sup> and SGFP1<sup>S2+/-;S4+/-</sup> iPSCs. **(K)** Flow cytometry analysis of Sox2-GFP-  
681 positive cells for SGFP1<sup>S2+/-</sup> compared with SGFP1<sup>S2+/-;S4+/-</sup> following reprogramming with OSKM (13 days  
682 of dox + 3 days dox withdrawal). **(L)** Comparative percentage of SOX2-GFP-positive cells for SGFP1<sup>S2+/-</sup>  
683 compared with SGFP1<sup>S2+/-;S4+/-</sup> following reprogramming with OSKM (13 days of dox + 3 days dox  
684 withdrawal). **(M)** Graph summarizing the number of colonies counted at the end of the reprogramming for  
685 SGFP1<sup>S2+/-</sup> and SGFP1<sup>S2+/-;S4+/-</sup>.

Figure 5

RL8 ESCs: *Sall4*<sup>2A-EGFP-2A-ERT-CRE-ERT</sup>; *Rosa26*<sup>M2rtTA;tdTomato-LSL</sup>

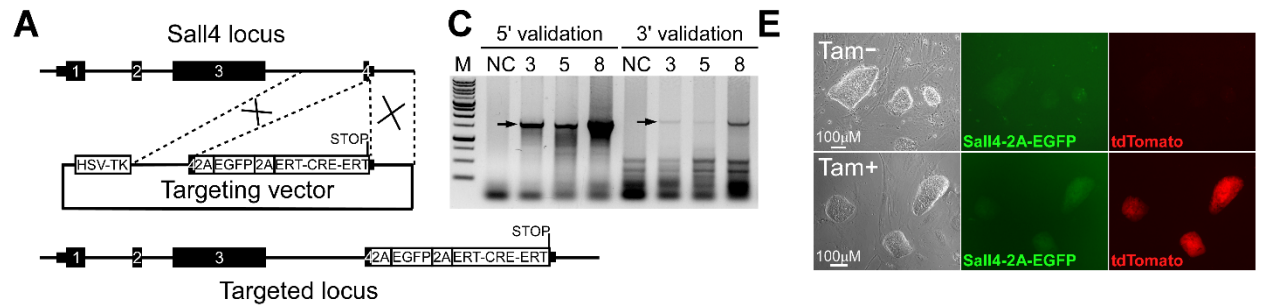

RL9 ESCs: *Nanog*<sup>2A-EGFP-2A-ERT-CRE-ERT</sup>; *Rosa26*<sup>M2rtTA;tdTomato-LSL</sup>

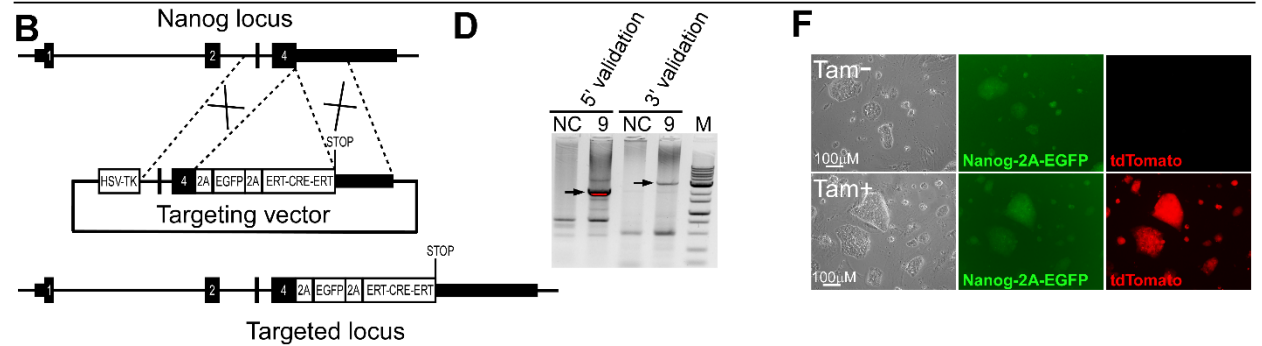

Sall4 tracing system (RL8)

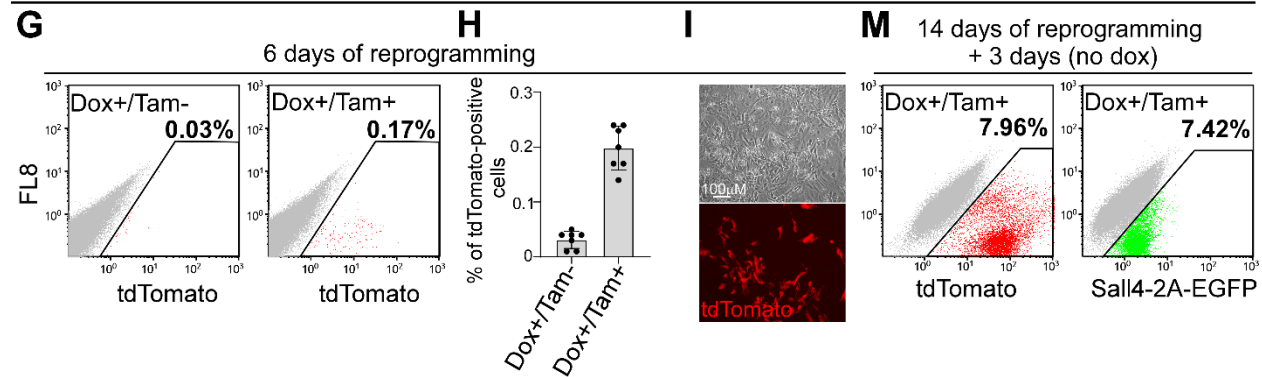

Nanog tracing system (RL9)

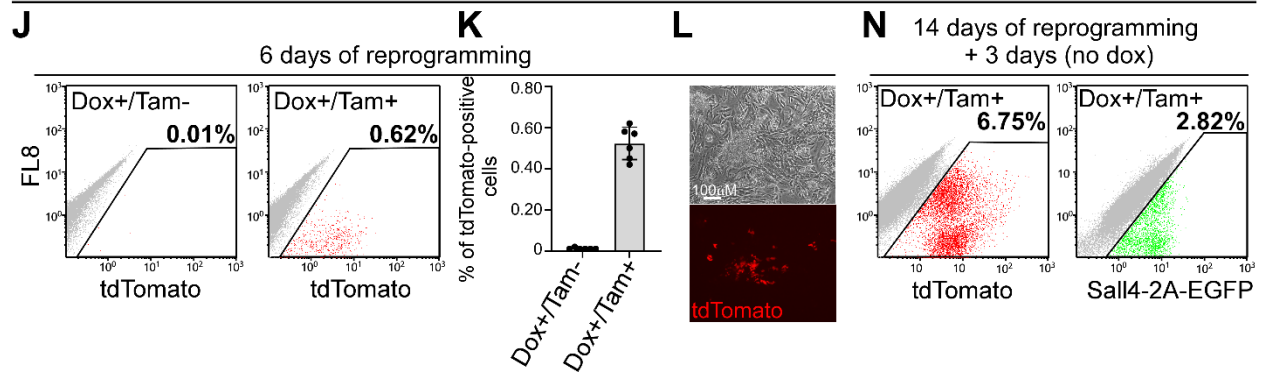



687 **Figure 5. Sall4 and Nanog tracing systems cannot explain the reprogramming blockage observed in the**  
688 **double heterozygous mutant cells. (A, B)** Schematic representation of the targeting strategy to  
689 introduce a 2A-EGFP-ERT-CRE-ERT cassette into the *Sall4* locus (A) or into the *Nanog* locus (B). **(C, D)** PCR  
690 validation for targeted colonies demonstrating a correct targeting band size for the *Sall4* locus (C) and  
691 for the *Nanog* locus (D) using both 5' and 3' regions of the incorporation point. Black arrows depict the  
692 band size of correctly targeted allele. NC- negative control. **(E, F)** Representative bright field, RFP and  
693 GFP channel images for the Sall4 tracing system (RL8, E) and for the Nanog tracing system (RL9, F)  
694 before and after tamoxifen addition. Scale bar, 100µm. **(G)** Flow cytometry analysis of tdTomato-  
695 positive RL8 MEFs that were infected with OSKM and submitted to dox for 6 days with or without  
696 tamoxifen (Tam). **(H)** Graph summarizing the percentages of tdTomato-positive cells of the Sall4 tracing  
697 system after 6 days of dox with or without Tamoxifen. **(I)** Bright field and RFP channel images of  
698 tdTomato-positive cells from the Sall4 tracing system after six days of dox and tamoxifen addition. **(J)**  
699 Flow cytometry analysis of tdTomato-positive RL9 MEFs that were infected with OSKM and submitted to  
700 dox for 6 days with or without tamoxifen (Tam). **(K)** Graph summarizing the percentages of tdTomato-  
701 positive cells of the Nanog tracing system after 6 days of dox with or without Tamoxifen. **(L)** Bright field  
702 and RFP channel images of tdTomato-positive cells from the Nanog tracing system after six days of dox  
703 and tamoxifen addition. **(M, N)** Flow cytometry analysis of tdTomato and Sall4-GFP-positive cells (M) or  
704 Nanog-GFP-positive cells (N) following 14 days of OSKM induction in the presence of dox and Tamoxifen  
705 followed by 3 days of dox withdrawal.

Figure 6

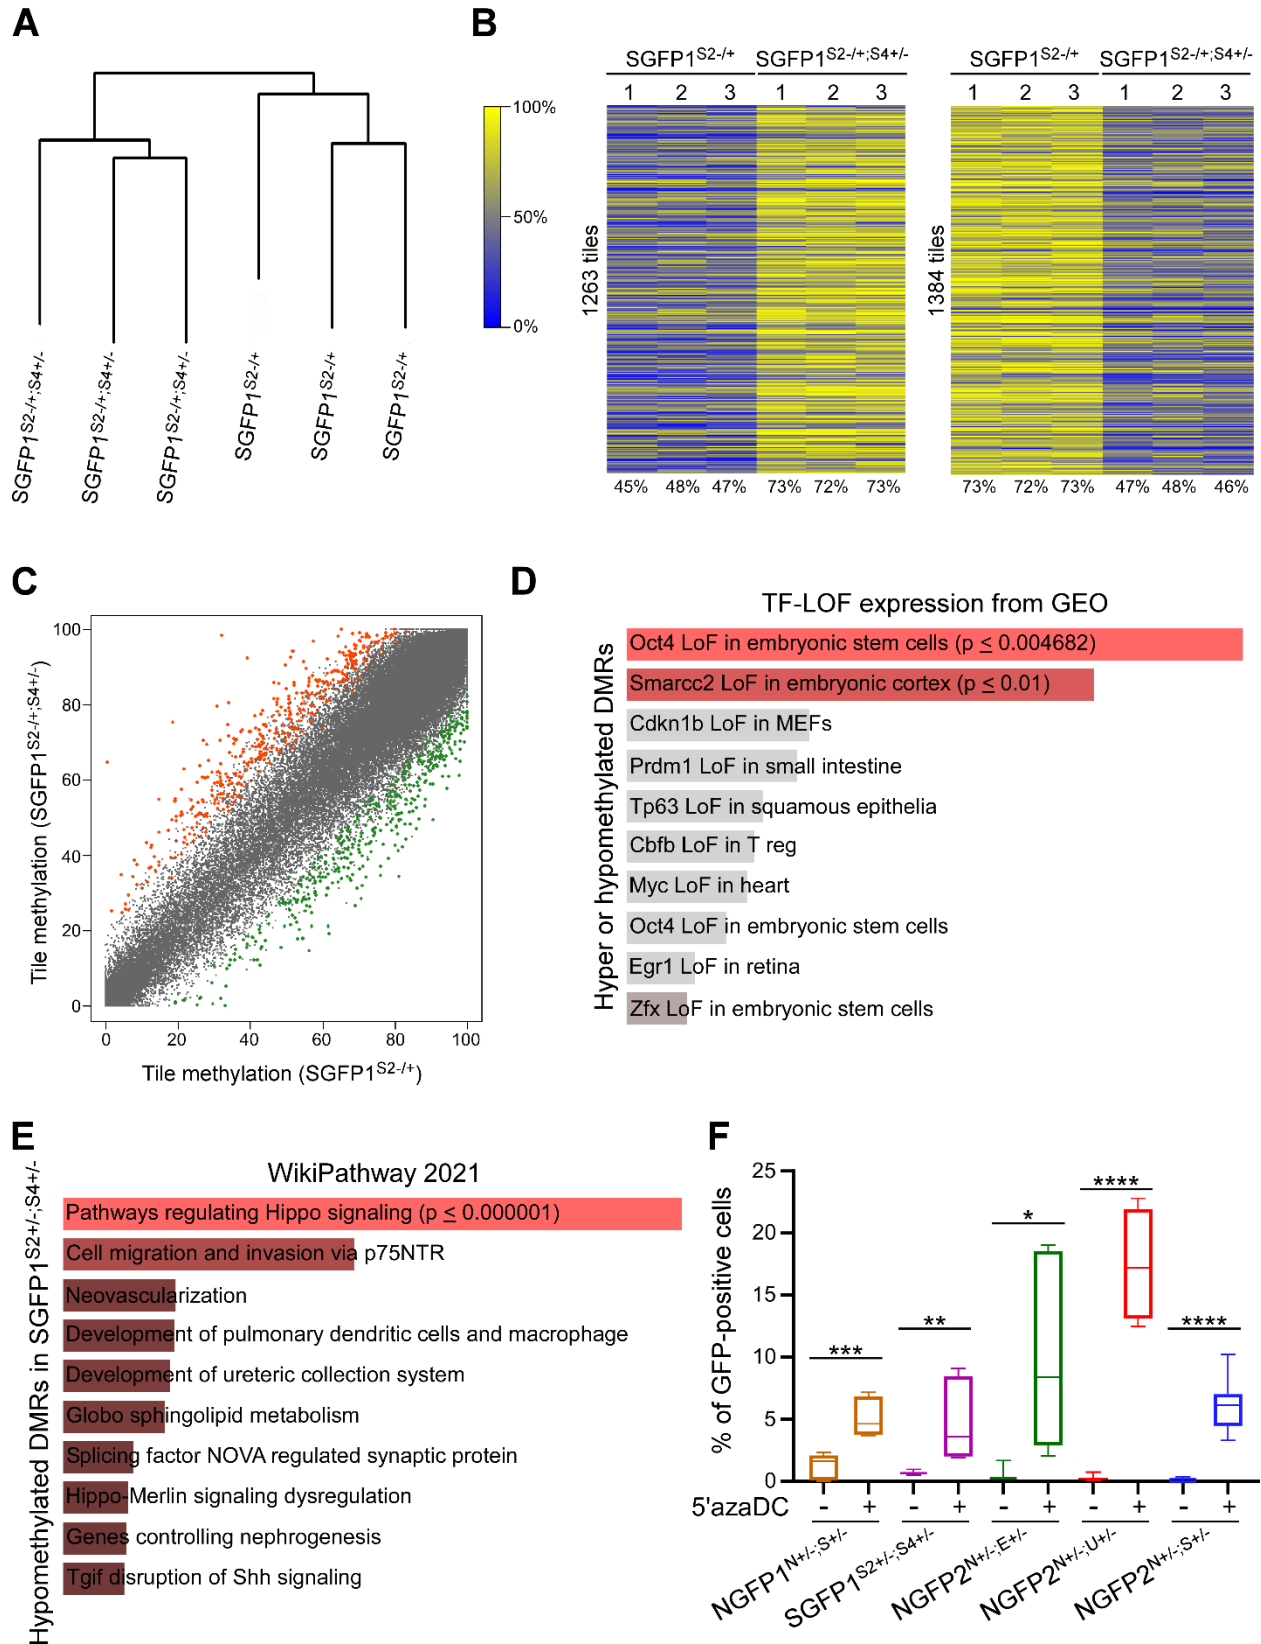

706

707

708 **Figure 6. DNA methylation abnormalities in the double heterozygous mutant fibroblasts hinder the**  
709 **reprogramming process. (A)** Dendrogram for SGFP1<sup>S2+/-</sup> MEFs and SGFP1<sup>S2+/-S4+/-</sup> MEFs based on the level  
710 of relative change observed at CpG sites with a threshold of 10 reads per site. **(B)** Heatmap of 20% of  
711 differentially methylated regions (DMRs) which covers a 100bp genomic region/tile and filtered to  
712 include at least 15 reads, which may be either hypermethylated or hypomethylated in SGFP1<sup>S2+/-S4+/-</sup>  
713 MEFs compared to its parental SGFP1<sup>S2+/-</sup> control MEFs. p-value  $\leq 0.001$ . **(C)** Scatter plot analysis showing  
714 all the differentially methylated regions between SGFP1<sup>S2+/-</sup> MEFs and SGFP1<sup>S2+/-S4+/-</sup> MEFs (average of 3  
715 biological replicates). Blue dots represent regions that are significantly more methylated in the double  
716 heterozygous mutant SGFP1<sup>S2+/-S4+/-</sup> MEFs while red dots represent regions that are more methylated in  
717 the control SGFP1<sup>S2+/-</sup> MEFs. Red dots represent regions that are associated with genes that are related  
718 to pluripotency and development and are significantly more methylated in SGFP1<sup>S2+/-S4+/-</sup> MEFs while  
719 green dots represent regions that are associated with genes that are related to pluripotency and  
720 development and are significantly more methylated in SGFP1<sup>S2+/-</sup> MEFs. Gray area represents no  
721 significant differences between the samples. **(D, E)** EnrichR of GEO (D) and wiki pathways analysis (E) of  
722 significantly over-represented genes that are either hyper or hypomethylated DMRs (D) or  
723 hypomethylated DMRs significantly enriched in SGFP1<sup>S2+/-S4+/-</sup> MEFs (E) **(F)** Bar plot graph displaying the  
724 percentage of GFP-positive cells in the indicated samples after 13 days of reprogramming and 3 days of  
725 transgene removal with and without prior treatment of 5'azaDC for two days. Error bars indicate  
726 standard deviation between 6-7 biological replicates. \*p-value  $\leq 0.01$ , \*\*p-value  $\leq 0.001$  as calculated by  
727 GraphPad Prism using 2-tailed Student's t-test.

Figure S1

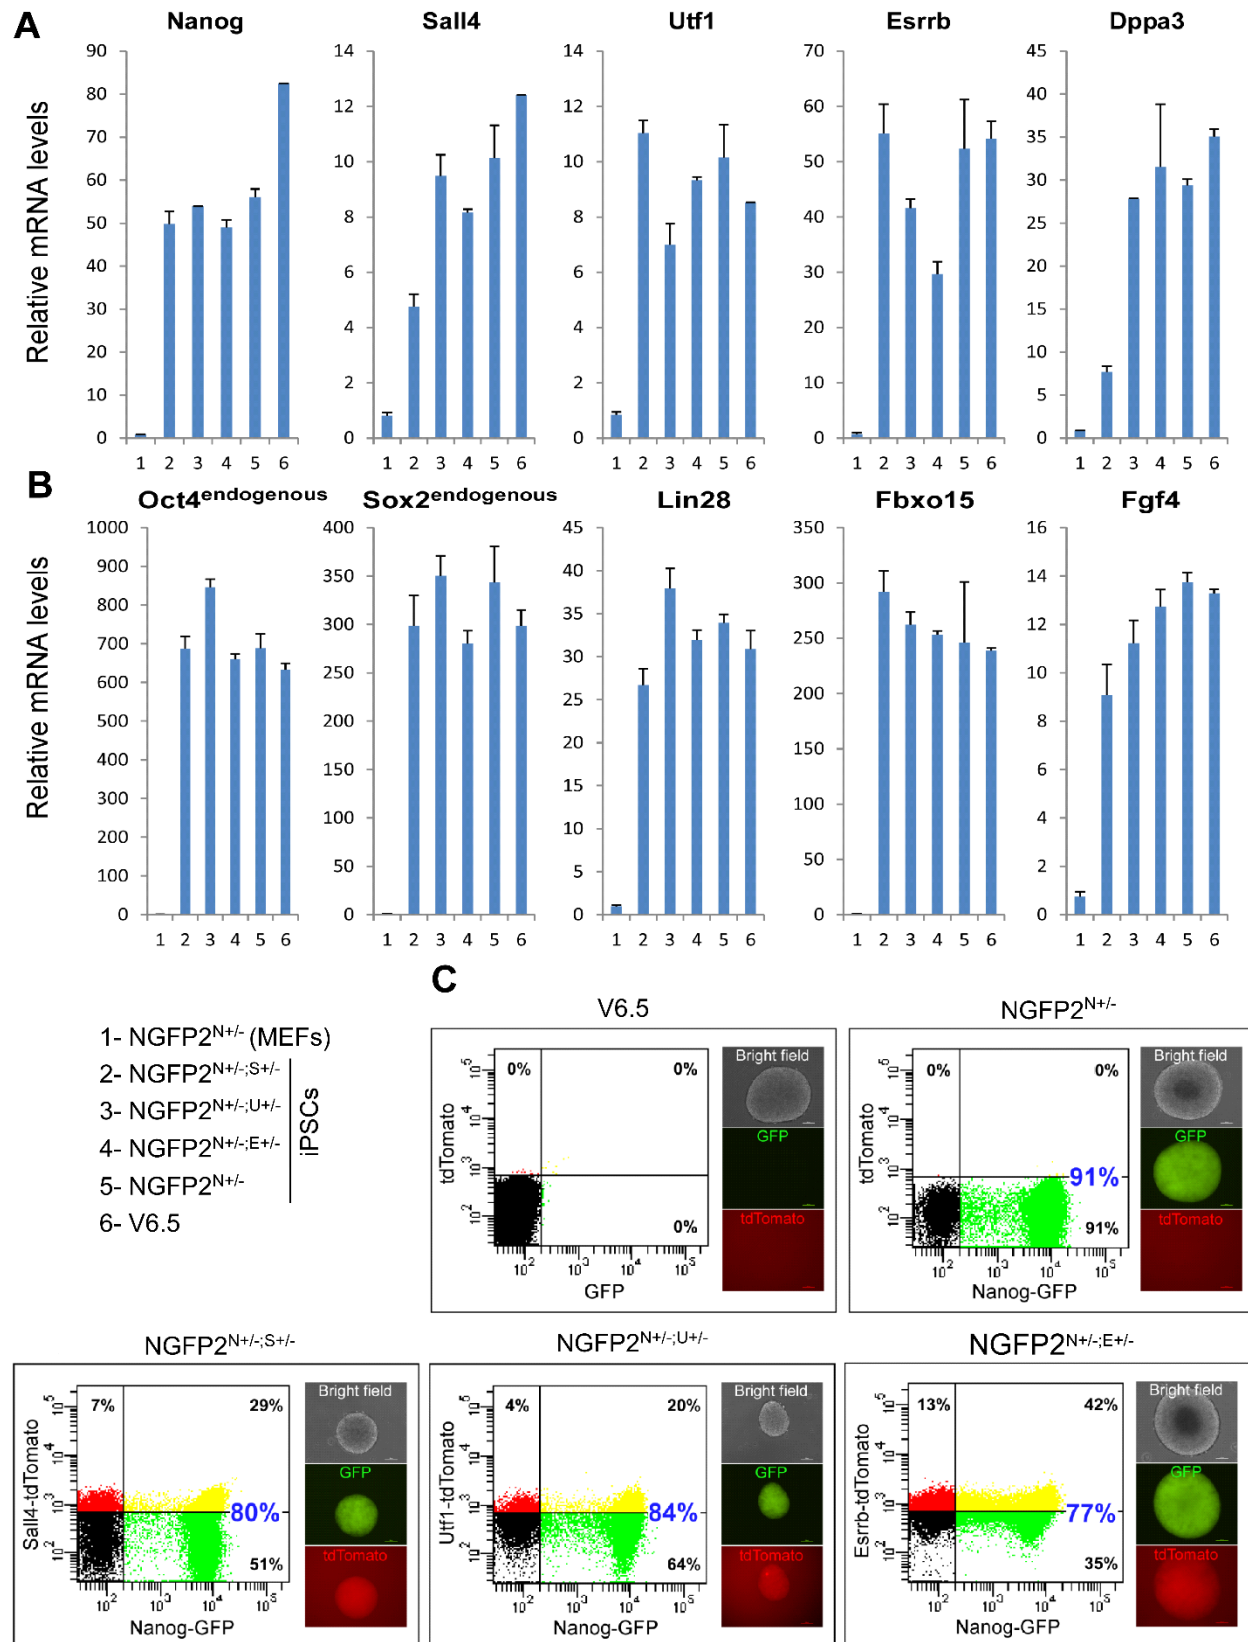

728

729 **Figure S1. Characterization of the double heterozygous mutant NGFP2<sup>N+/-</sup> lines. (A)** qPCR of the  
730 indicated genes normalized to the housekeeping control gene *Gapdh* in the various NGFP2<sup>N+/-</sup> double  
731 heterozygous mutant lines, NGFP2<sup>N+/-</sup> parental line, and ESC (V6.5) and MEF controls. Error bars  
732 presented as a mean  $\pm$  SD of 2 duplicate runs from a typical experiment out of 3 independent  
733 experiments. **(B)** Flow cytometry analysis for GFP (*Nanog*) and tdTomato (*Utf1*, *Esrrb* or *Sal14*) in the  
734 various double heterozygous mutant lines that grew under 2i/Lif conditions. Note that although  
735 tdTomato lacks polyA, a red signal is still detectable

Figure S2

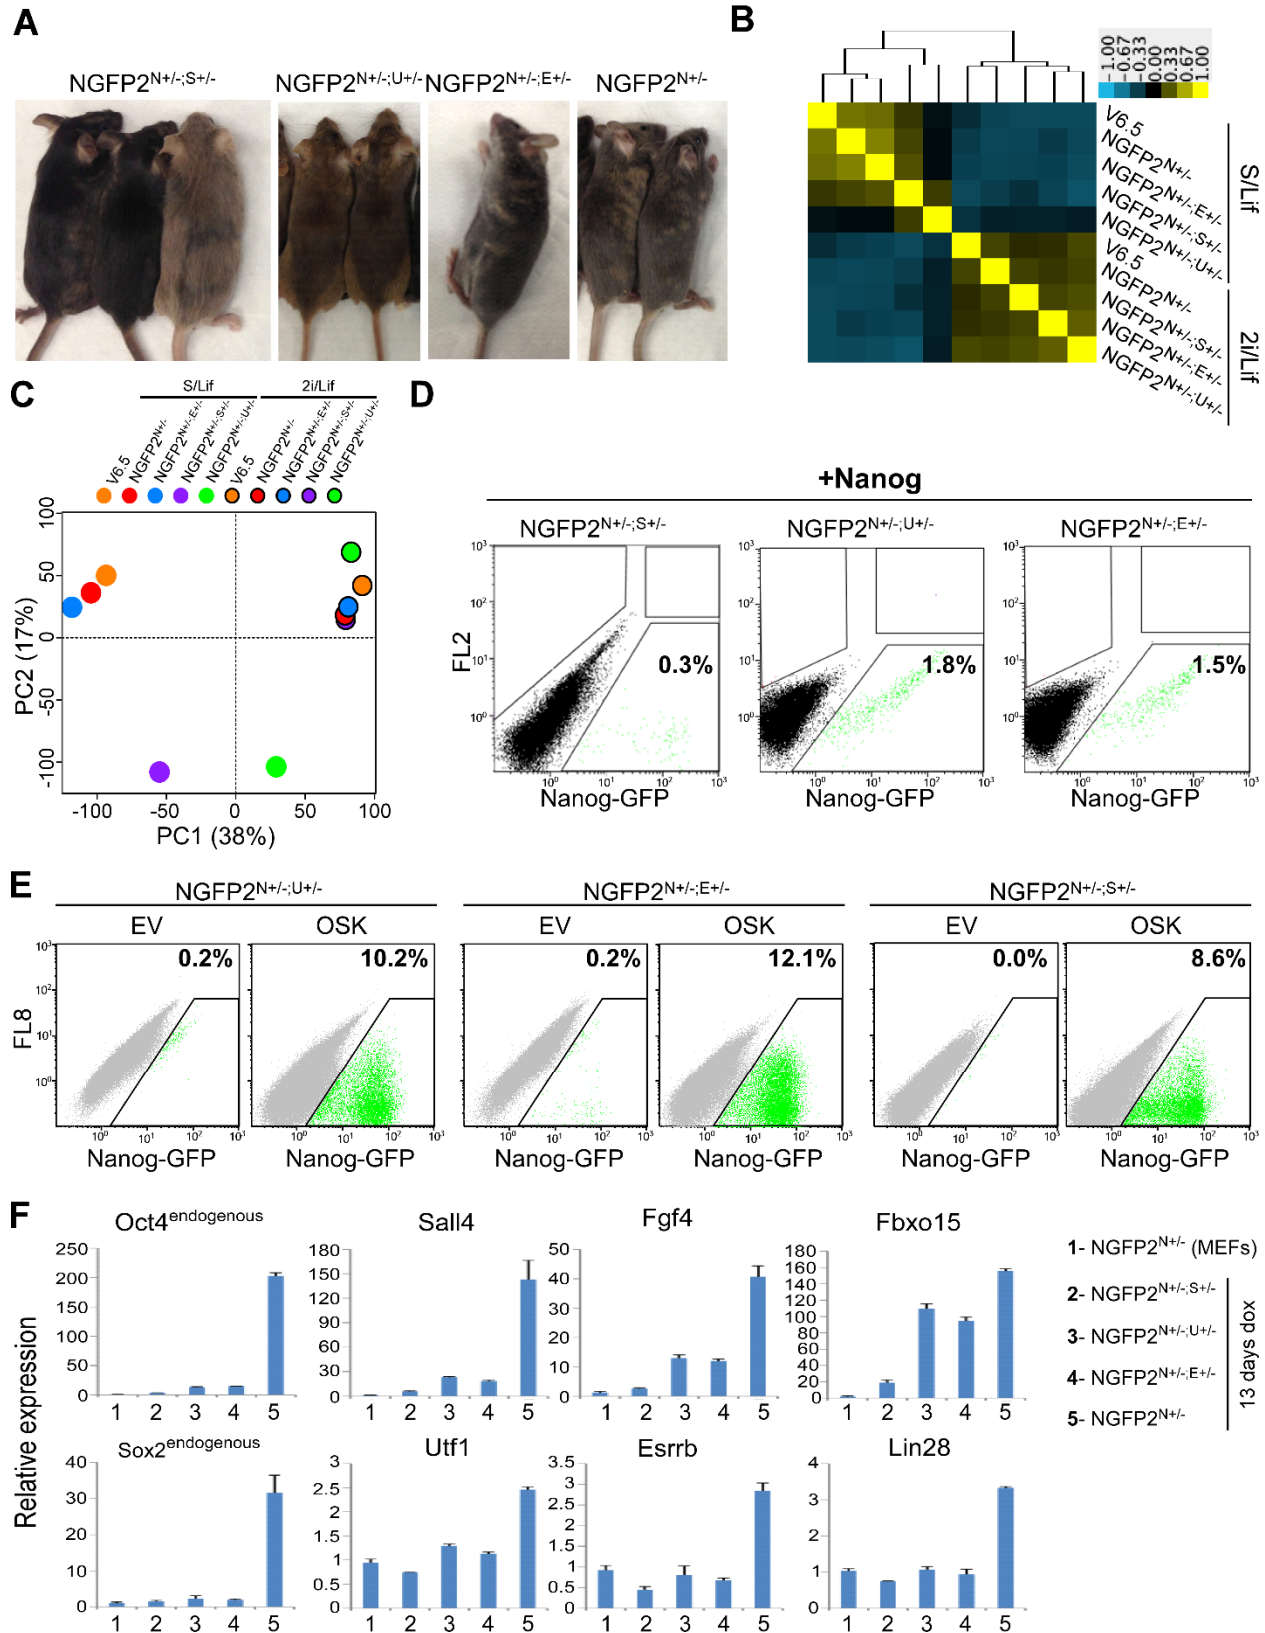

736

737

738 **Figure S2. The developmental potential and transcriptional profile of NGFP2<sup>N+/-</sup> double heterozygous**  
739 **mutant lines and rescue reprogramming experiments (A)** Representative images of adult chimeric mice  
740 produced by the various NGFP2<sup>N+/-</sup> double heterozygous mutant iPSC lines and control following  
741 blastocyst injection and transplantation into foster mothers. **(B)** Correlation heatmap and dendrogram  
742 of global gene expression profiles for two RNA-seq replicates for the indicated NGFP2<sup>N+/-</sup> iPSC lines and  
743 ESC (V6.5) control grown under S/Lif or 2i/Lif conditions. Replicate pairs were assigned a shared  
744 numerical value. **(C)** Principle component analysis for the indicated samples using 500 most differentially  
745 expressed genes among all samples. PC1, 38%; PC2, 17%. Each line is marked by a specific color. The  
746 group names correspond to the names in (B). Cells that were grown in 2i/Lif are surrounded with black  
747 circle. **(D, E)** Flow cytometry analysis of Nanog-GFP-positive cells for the various NGFP2<sup>N+/-</sup> double  
748 heterozygous mutant lines following overexpression of *Nanog* (D) or OSK (E) and reprogramming for 13  
749 days following by 3 days of dox removal. OSK indicates *Oct4*, *Sox2* and *Klf4* and EV indicates empty  
750 vector **(F)** NGFP2<sup>N+/-</sup> double heterozygous mutant lines and control were reprogrammed for 13 days.  
751 qPCR analysis showing the expression levels of the indicated genes, in the depicted samples, after  
752 *Gapdh* normalization. Error bars presented as a mean  $\pm$  SD of 2 duplicate runs from a typical experiment  
753 out of 3 independent experiments.

## Figure S3

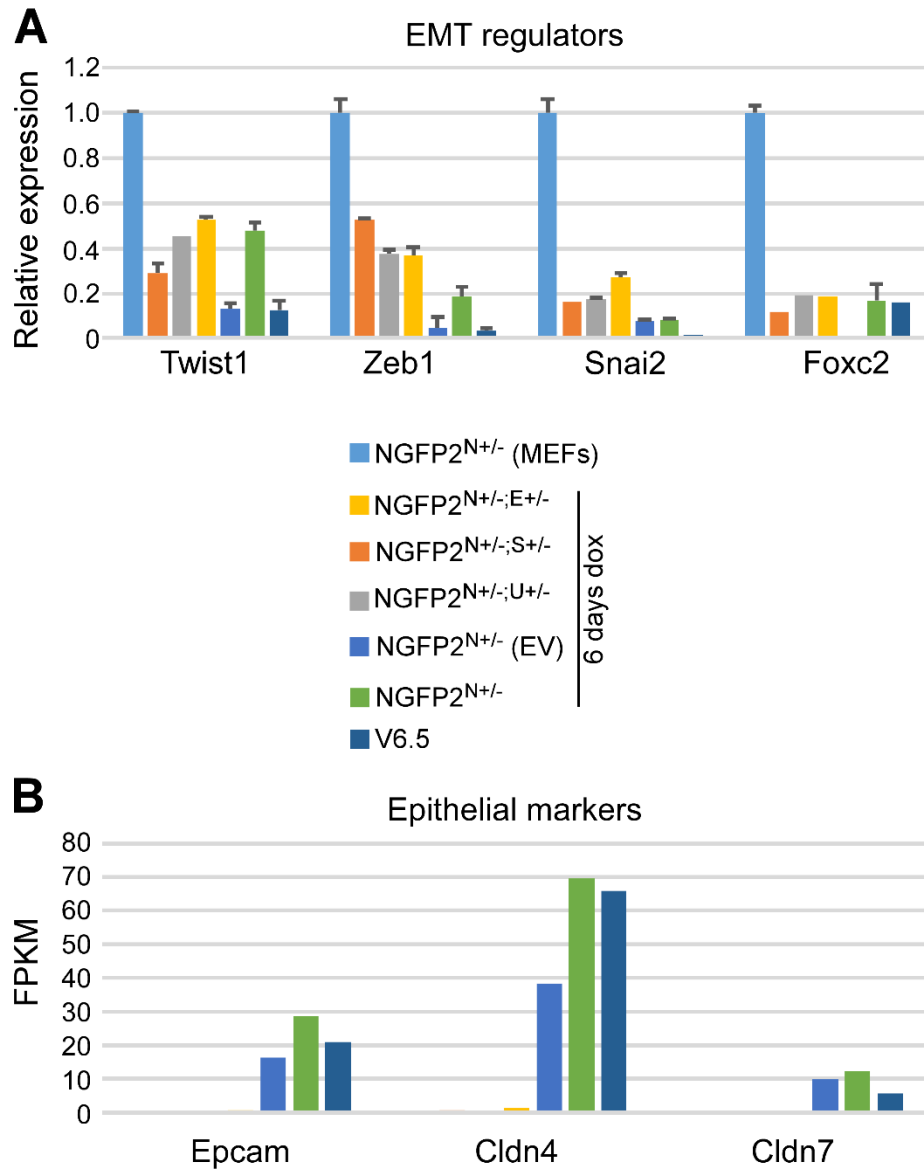

754

755



756 **Figure S3. NGFP2<sup>N+/-</sup> double heterozygous mutant lines fail to activate the epithelial program during**  
757 **reprogramming. (A)** qPCR of the indicated EMT genes normalized to housekeeping control gene *Gapdh*  
758 in the various NGFP2<sup>N+/-</sup> double heterozygous mutant lines following 6 days of dox and in ESCs (V6.5)  
759 and NGFP2<sup>N+/-</sup> MEF control. Error bars presented as a mean  $\pm$  SD of 2 duplicate runs from a typical  
760 experiment out of 3 independent experiments. **(B)** Graph summarizing the expression level (FPKM-  
761 Fragments Per Kilobase Million) of the indicated epithelial genes in the various NGFP2<sup>N+/-</sup> double  
762 heterozygous mutant lines after 6 days of dox and in ESCs (V6.5) and NGFP2<sup>N+/-</sup> MEF control. Expression  
763 level of the depicted genes was obtained from the RNA-seq data described in Figure 3.

## Figure S4

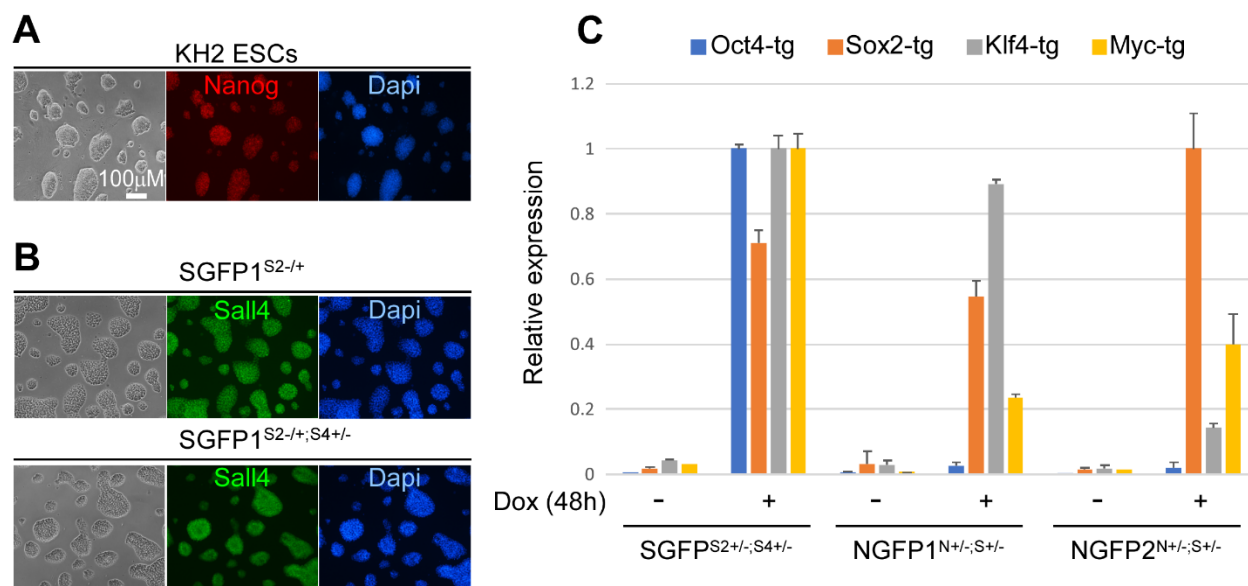

764

765

766 **Figure S4. Nanog and Sall4 protein level in targeted iPSC lines and controls (A)** Bright field images and  
767 immunostaining images for *Nanog* (red) and Dapi (blue) in KH2 ESCs. Scale bar, 100 $\mu$ M. **(B)** Bright field  
768 images and immunostaining images for Sall4 (green) and Dapi (blue) in SGFP1<sup>S2+/-</sup> and SGFP1<sup>S2+/-;S4+/-</sup> iPSC  
769 lines. Scale bar, 100  $\mu$ M. **(C)** qPCR of the indicated OSKM transgenes normalized to housekeeping control  
770 gene *Gapdh* in the various double heterozygous mutant MEF lines following 2 days of culture with or  
771 without dox. Error bars presented as a mean  $\pm$  SD of 2 duplicate runs from a typical experiment out of 3  
772 independent experiments.

## Figure S5

RL8 ESCs:  $Sall4^{2A-EGFP-2A-ERT-CRE-ERT}; Rosa26^{M2rtTA}; tdTomato-LSL$

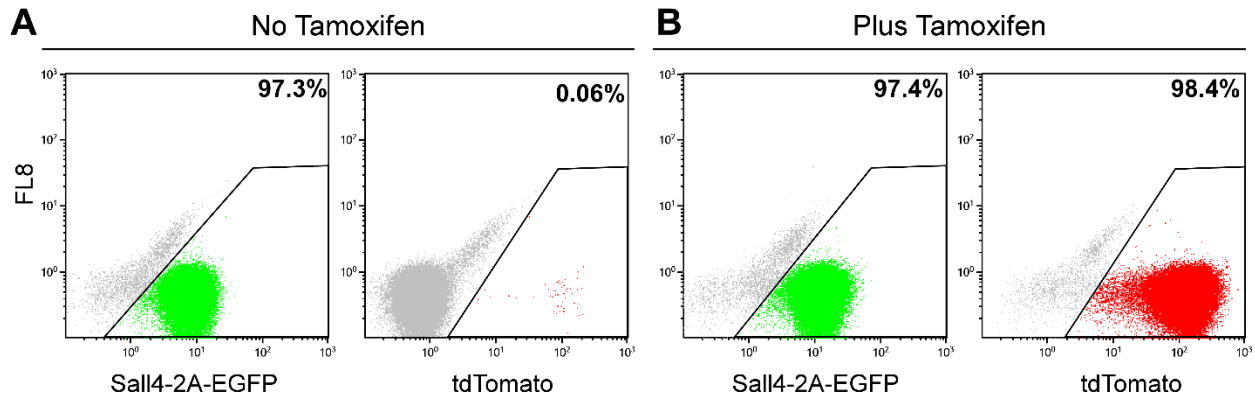

RL9 ESCs:  $Nanog^{2A-EGFP-2A-ERT-CRE-ERT}; Rosa26^{M2rtTA}; tdTomato-LSL$

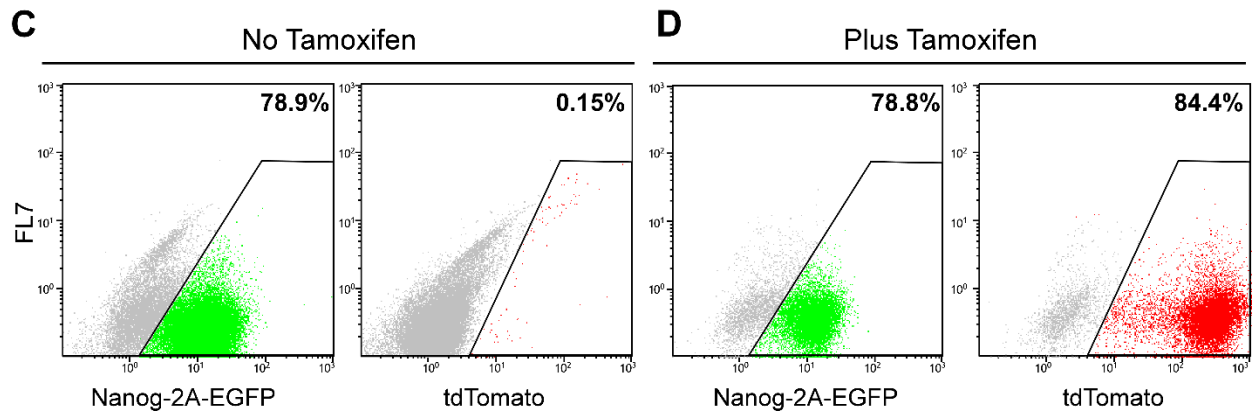

773

774

775 **Figure S5. Sall4 and Nanog tracing system characterization. (A)** Flow cytometry analysis for Sall4-2A-  
776 EGFP and tdTomato in the targeted ESC clone RL8 before and after tamoxifen addition (48 hours). **(B)**  
777 Flow cytometry analysis for Nanog-2A-EGFP and tdTomato in the targeted ESC clone RL9 before and  
778 after tamoxifen addition (48 hours).

779 **Table 1. primer list**

| Gene            | Application                                    | Primer Sequence (5' --> 3')                                 |
|-----------------|------------------------------------------------|-------------------------------------------------------------|
| Gapdh           | qPCR analysis of mRNA expression normalization | F: CCTCAACGACCACTTTGTCAAG<br>R: TCTTCCTCTGTGCTCTTGCTG       |
| Thy1            | qPCR analysis of mRNA expression               | F: CCAGAACGTCACAGTGCTCA<br>R: AGGTGTTCTGAGCCAGCAG           |
| Col5a2          | qPCR analysis of mRNA expression               | F: TAGAGGAAGAAAGGGACAAAAGG<br>R: GTTACAACAGGCACTAATCCTGGTT  |
| Postn           | qPCR analysis of mRNA expression               | F: ACAACAATCTGGGGCTTTTT<br>R: AATCTGGTTCCCATGGATGA          |
| Des             | qPCR analysis of mRNA expression               | F: TGGAGCGTGACAACCTGATA<br>R:AAGGCAGCCAAGTTGTTCTC           |
| Cdh1            | qPCR analysis of mRNA expression               | F: CTCGACACCCGATTCAAAGT<br>R: GCGTAGACCAAGAAATGGA           |
| Dsp             | qPCR analysis of mRNA expression               | F: ACCGTCAACGACCAGAACTC<br>R: TTTGCAGCATTTCTTGATG           |
| Nanog           | qPCR analysis of mRNA expression               | F: AAACCAGTGGTTGAAGACTAGCAA<br>R: GGTGCTGAGCCCTTCTGAATC     |
| Oct4 endogenous | qPCR analysis of mRNA expression               | F: TCAGTGATGCTGTTGATCAGG<br>R: GCTATCTACTGTGTGCCAGTC        |
| Sox2 endogenous | qPCR analysis of mRNA expression               | F: CCGTTTTCTGTGGTCTTGTTT<br>R: TCAACCTGCATGGACATTTT         |
| Lin28           | qPCR analysis of mRNA expression               | F: GAAGAACATGCAGAAGCGAAGA<br>R: CCGCAGTTGTAGCACCTGTCT       |
| Fbxo15          | qPCR analysis of mRNA expression               | F: CGAGAATGGTGGACTAGCTTTTG<br>R: GGCCATGGGAATGAATATTTG      |
| Fgf4            | qPCR analysis of mRNA expression               | F: GCAGACACGAGGGACAGTCT<br>R: ACTCCGAAGATGCTCACCAC          |
| Sall4           | qPCR analysis of mRNA expression               | F: GCAAGTCACCAGGGCTCTT<br>R: CCTCCTTAGCTGACAGCAATC          |
| Utf1            | qPCR analysis of mRNA expression               | F: GTCCCTCTCCGCGTTAGC<br>R: GGCAGGTTTCGTCATTTTCC            |
| Esrrb           | qPCR analysis of mRNA expression               | F: CACCTGCTAAAAAGCCATTGACT<br>R: CAACCCCTAGTAGATTTCGAGACGAT |
| Dppa3           | qPCR analysis of mRNA expression               | F: TCGGATTGAGCAGAGACAAAAA<br>R: TCCCGTTCAAACCTCATTTCCTT     |
| Twist1          | qPCR analysis of mRNA expression               | F: ACGCTGCCCTCGGACAA<br>R: CCTGGCCGCCAGTTTG                 |
| Zeb1            | qPCR analysis of mRNA expression               | F: CCAGGTGTAAGCGCAGAAAG<br>R: TCATCGGAATCTGAATTTGCT         |
| Snai2           | qPCR analysis of mRNA expression               | F: ATCCTCACCTCGGGAGCATA<br>R: TGCCGACGATGTCCATACAG          |
| Foxc2           | qPCR analysis of mRNA expression               | F: AGAACAGCATCCGCCACAAC<br>R: GCACTTTACGAAGCACTCATT         |
| Oct4-transgene  | qPCR analysis of transgenic                    | F : CGCCTGGAGACGCCATCCACGCT                                 |

|                                |                                                                     |                                                                       |
|--------------------------------|---------------------------------------------------------------------|-----------------------------------------------------------------------|
|                                | mRNA expression                                                     | R: GTTGGTTCCACCTTCTCCAA                                               |
| Sox2-transgene                 | qPCR analysis of transgenic mRNA expression                         | F: GCCCAGTAGACTGCACATGG<br>R: AGAATACCAGTCAATCTTTCA                   |
| Klf4-transgene                 | qPCR analysis of transgenic mRNA expression                         | F: CGCCTGGAGACGCCATCCACGCT<br>R: ACGCAGTGTCTTCTCCCTTC                 |
| Myc-transgene                  | qPCR analysis of transgenic mRNA expression                         | F: TGTCCATTCAAGCAGACGAG<br>R: AGAATACCAGTCAATCTTTCA                   |
| Nanog gRNA                     | gRNA for generating Nanog KO iPSCs                                  | F: CACCGAGAACTATTCTTGCTTACA<br>R: AAAGTGAAGCAAGAATAGTTCTC             |
| Nanog KO                       | KO validation PCR                                                   | F: CGGCTCACTTCTTCTGACT<br>R: TATTGCTCCGTCTGTGTCC                      |
| Nanog tracing 5 arm            | PCR for generating arm for targeting vector                         | F: TAACAGCTGAAGTACCTCAGCCTCCAGCA<br>R: TAACAGCTGTATTTACCTGGTGGAGTCACA |
| Nanog tracing 3 arm            | PCR for generating arm for targeting vector                         | F: GGTACCCAGCCCCTGGTTTATTTTT<br>R: CCGCGGACCCACACAGCCTCTCAAGT         |
| Nanog gRNA                     | gRNA tracing                                                        | F: CACCGGATTTGAACTCCTGACCTT<br>R: AAACAAGGTCAGGAGTTCAAATCC            |
| Nanog validation 5 arm tracing | PCR analysis of integration into genomic DNA                        | F: CCACCCCGTGAAGTACTGACT<br>R: CGTCACCGCATGTTAGAAGA                   |
| Nanog validation 3 arm tracing | PCR analysis of integration into genomic DNA                        | F: GGTACCCAGCCCCTGGTTTATTTTT<br>R: CCCTGTGAGTGGTCAGGAGT               |
| Sall4 tracing 5 arm            | PCR for generating arm for targeting vector                         | F: GTTAACGCAAGGGAGAGCCAGTATT<br>R: GTTAACGCTGACAGCAATCTTATT           |
| Sall4 tracing 3 arm            | PCR for generating arm for targeting vector                         | F: GGTACCCTGATATGCAAGTGATGT<br>R: CCGCGGATACACACAAGCCCGCCTC           |
| Sall4 gRNA                     | gRNA tracing                                                        | F: CACCGGAGGAGAGGAGTCTTCTGC<br>R: AAACGCAGAAGACTCCTCTCCTCC            |
| Sall4 validation 5 arm tracing | PCR analysis of integration into genomic DNA                        | F: TAATCCAGCCTTGCTCGTCT<br>R: CGTCACCGCATGTTAGAAGA                    |
| Sall4 validation 3 arm tracing | PCR analysis of integration into genomic DNA                        | F: ACAGCTGTGAGGTTACCCTGA<br>R: GTGTGTGTGTGTCCTCCTC                    |
| Nanog-cDNA                     | Primers used for cloning of cDNA for lentiviral gene overexpression | F: CGCCATCACACTGACATGA<br>R: TGGAAGAAGGAAGGAACCTG                     |
| Sall4-cDNA                     | Primers used for cloning of cDNA for lentiviral gene overexpression | F: GCAAGTCACCAGGGCTCTT<br>R: CCTCTTAGCTGACAGCAAT                      |
| Esrrb-cDNA                     | Primers used for cloning of cDNA for lentiviral gene overexpression | F: GCTGGAACACCTGAGGGTAA<br>R: GGTCTCCACTTGGATCGTGT                    |
| Utf1-cDNA                      | Primers used for cloning of cDNA for lentiviral gene overexpression | F: CTACCTGGCTCAGGGATGCT<br>R: GACTGGGAGTCGTTTCTGGA                    |
| Sall4 gRNA                     | gRNA for generating Sall4 KI/KO in NGFP1 and SGFP1                  | F: CACCGCCAGCTCTCCGCGGATGGT<br>R: AAACACCATCCGCGGAGAGCTGGC            |
| Sall4 5arm validation PCR      | PCR analysis of integration                                         | F: CATAACAAAGCCCCAGGTT                                                |

|                           |                                              |                                                                |
|---------------------------|----------------------------------------------|----------------------------------------------------------------|
|                           | into genomic DNA                             | R: GCGCATGAACTCTTTGATGA                                        |
| Sall4 3arm validation PCR | PCR analysis of integration into genomic DNA | F: CGGGATCCGAAGTTCCTATT<br>R: AGCTTGCAAAGGGAAAGACA             |
| Sall4 targeting 5arm      | PCR for generating arm for targeting vector  | F: GTTAACGTGGTGCAGGCCTGTTATCT<br>R: AAGCTTCTCCTCCCAGTTGATGTGCT |
| Sall4 targeting 3arm      | PCR for generating arm for targeting vector  | F: CCGCGGTGGTCCACCTGGAACAAAA<br>R: CCGCGGAGAAGGGAGCTATGGCACA   |

780



## 781 REFERENCES

- 782 Adachi, K., Kopp, W., Wu, G., Heising, S., Greber, B., Stehling, M., Arauzo-Bravo, M.J., Boerno, S.T.,  
783 Timmermann, B., Vingron, M., *et al.* (2018). Esrrb Unlocks Silenced Enhancers for Reprogramming to  
784 Naive Pluripotency. *Cell stem cell* 23, 900-904.
- 785 Akalin, A., Kormaksson, M., Li, S., Garrett-Bakelman, F.E., Figueroa, M.E., Melnick, A., and Mason, C.E.  
786 (2012). methylKit: a comprehensive R package for the analysis of genome-wide DNA methylation  
787 profiles. *Genome Biol* 13, R87.
- 788 Arnold, K., Sarkar, A., Yram, M.A., Polo, J.M., Bronson, R., Sengupta, S., Seandel, M., Geijsen, N., and  
789 Hochedlinger, K. (2011). Sox2(+) adult stem and progenitor cells are important for tissue regeneration  
790 and survival of mice. *Cell stem cell* 9, 317-329.
- 791 Avilion, A.A., Nicolis, S.K., Pevny, L.H., Perez, L., Vivian, N., and Lovell-Badge, R. (2003). Multipotent cell  
792 lineages in early mouse development depend on SOX2 function. *Genes Dev* 17, 126-140.
- 793 Benchetrit, H., Herman, S., van Wietmarschen, N., Wu, T., Makedonski, K., Maoz, N., Yom Tov, N., Stave,  
794 D., Lasry, R., Zayat, V., *et al.* (2015). Extensive Nuclear Reprogramming Underlies Lineage Conversion  
795 into Functional Trophoblast Stem-like Cells. *Cell stem cell* 17, 543-556.
- 796 Benchetrit, H., Jaber, M., Zayat, V., Sebban, S., Pushett, A., Makedonski, K., Zakheim, Z., Radwan, A.,  
797 Maoz, N., Lasry, R., *et al.* (2019). Direct Induction of the Three Pre-implantation Blastocyst Cell Types  
798 from Fibroblasts. *Cell stem cell* 24, 983-994 e987.
- 799 Boiani, M., Eckardt, S., Scholer, H.R., and McLaughlin, K.J. (2002). Oct4 distribution and level in mouse  
800 clones: consequences for pluripotency. *Genes Dev* 16, 1209-1219.
- 801 Boyle, P., Clement, K., Gu, H., Smith, Z.D., Ziller, M., Fostel, J.L., Holmes, L., Meldrim, J., Kelley, F., Gnirke,  
802 A., *et al.* (2012). Gel-free multiplexed reduced representation bisulfite sequencing for large-scale DNA  
803 methylation profiling. *Genome Biol* 13, R92.
- 804 Buganim, Y., Faddah, D.A., Cheng, A.W., Itskovich, E., Markoulaki, S., Ganz, K., Klemm, S.L., van  
805 Oudenaarden, A., and Jaenisch, R. (2012). Single-cell expression analyses during cellular reprogramming  
806 reveal an early stochastic and a late hierarchic phase. *Cell* 150, 1209-1222.
- 807 Buganim, Y., Faddah, D.A., and Jaenisch, R. (2013). Mechanisms and models of somatic cell  
808 reprogramming. *Nature reviews Genetics* 14, 427-439.
- 809 Buganim, Y., Markoulaki, S., van Wietmarschen, N., Hoke, H., Wu, T., Ganz, K., Akhtar-Zaidi, B., He, Y.,  
810 Abraham, B.J., Porubsky, D., *et al.* (2014). The developmental potential of iPSCs is greatly influenced by  
811 reprogramming factor selection. *Cell stem cell* 15, 295-309.
- 812 Carey, B.W., Markoulaki, S., Hanna, J.H., Faddah, D.A., Buganim, Y., Kim, J., Ganz, K., Steine, E.J., Cassady,  
813 J.P., Creighton, M.P., *et al.* (2011). Reprogramming factor stoichiometry influences the epigenetic state  
814 and biological properties of induced pluripotent stem cells. *Cell stem cell* 9, 588-598.
- 815 Carter, A.C., Davis-Dusenbery, B.N., Koszka, K., Ichida, J.K., and Eggan, K. (2014). Nanog-independent  
816 reprogramming to iPSCs with canonical factors. *Stem cell reports* 2, 119-126.
- 817 De Carvalho, D.D., You, J.S., and Jones, P.A. (2010). DNA methylation and cellular reprogramming.  
818 *Trends in cell biology* 20, 609-617.
- 819 Eastman, A.E., Chen, X., Hu, X., Hartman, A.A., Pearlman Morales, A.M., Yang, C., Lu, J., Kueh, H.Y., and  
820 Guo, S. (2020). Resolving Cell Cycle Speed in One Snapshot with a Live-Cell Fluorescent Reporter. *Cell*  
821 *Rep* 31, 107804.
- 822 Elling, U., Woods, M., Forment, J.V., Fu, B., Yang, F., Ng, B.L., Vicente, J.R., Adams, D.J., Doe, B., Jackson,  
823 S.P., *et al.* (2019). Derivation and maintenance of mouse haploid embryonic stem cells. *Nat Protoc* 14,  
824 1991-2014.
- 825 Feng, B., Jiang, J., Kraus, P., Ng, J.H., Heng, J.C., Chan, Y.S., Yaw, L.P., Zhang, W., Loh, Y.H., Han, J., *et al.*  
826 (2009). Reprogramming of fibroblasts into induced pluripotent stem cells with orphan nuclear receptor  
827 Esrrb. *Nat Cell Biol* 11, 197-203.

828 Festuccia, N., Osorno, R., Halbritter, F., Karwacki-Neisius, V., Navarro, P., Colby, D., Wong, F., Yates, A.,  
829 Tomlinson, S.R., and Chambers, I. (2012). *Esrrb* is a direct Nanog target gene that can substitute for  
830 Nanog function in pluripotent cells. *Cell stem cell* *11*, 477-490.

831 Galili, T. (2015). *dendextend*: an R package for visualizing, adjusting and comparing trees of hierarchical  
832 clustering. *Bioinformatics* *31*, 3718-3720.

833 Guo, L., Lin, L., Wang, X., Gao, M., Cao, S., Mai, Y., Wu, F., Kuang, J., Liu, H., Yang, J., *et al.* (2019).  
834 Resolving Cell Fate Decisions during Somatic Cell Reprogramming by Single-Cell RNA-Seq. *Mol Cell* *73*,  
835 815-829 e817.

836 Haenebalcke, L., Goossens, S., Dierickx, P., Bartunkova, S., D'Hont, J., Haigh, K., Hochepped, T., Wirth, D.,  
837 Nagy, A., and Haigh, J.J. (2013). The ROSA26-iPSC mouse: a conditional, inducible, and exchangeable  
838 resource for studying cellular (De)differentiation. *Cell Rep* *3*, 335-341.

839 Heinz, S., Benner, C., Spann, N., Bertolino, E., Lin, Y.C., Laslo, P., Cheng, J.X., Murre, C., Singh, H., and  
840 Glass, C.K. (2010). Simple combinations of lineage-determining transcription factors prime cis-regulatory  
841 elements required for macrophage and B cell identities. *Mol Cell* *38*, 576-589.

842 Heslop, J.A., Pournasr, B., Liu, J.T., and Duncan, S.A. (2021). GATA6 defines endoderm fate by controlling  
843 chromatin accessibility during differentiation of human-induced pluripotent stem cells. *Cell Rep* *35*,  
844 109145.

845 Leeb, M., and Wutz, A. (2011). Derivation of haploid embryonic stem cells from mouse embryos. *Nature*  
846 *479*, 131-134.

847 Martinez-Val, A., Lynch, C.J., Calvo, I., Ximenez-Embun, P., Garcia, F., Zarzuela, E., Serrano, M., and  
848 Munoz, J. (2021). Dissection of two routes to naive pluripotency using different kinase inhibitors. *Nat*  
849 *Commun* *12*, 1863.

850 Masui, S., Nakatake, Y., Toyooka, Y., Shimosato, D., Yagi, R., Takahashi, K., Okochi, H., Okuda, A.,  
851 Matoba, R., Sharov, A.A., *et al.* (2007). Pluripotency governed by Sox2 via regulation of Oct3/4  
852 expression in mouse embryonic stem cells. *Nat Cell Biol* *9*, 625-635.

853 Meissner, A., Wernig, M., and Jaenisch, R. (2007). Direct reprogramming of genetically unmodified  
854 fibroblasts into pluripotent stem cells. *Nat Biotechnol* *25*, 1177-1181.

855 Miyanari, Y., and Torres-Padilla, M.E. (2012). Control of ground-state pluripotency by allelic regulation of  
856 Nanog. *Nature* *483*, 470-473.

857 Morshedi, A., Soroush Noghabi, M., and Droge, P. (2013). Use of UTF1 genetic control elements as iPSC  
858 reporter. *Stem Cell Rev Rep* *9*, 523-530.

859 Nichols, J., Zevnik, B., Anastassiadis, K., Niwa, H., Klewe-Nebenius, D., Chambers, I., Scholer, H., and  
860 Smith, A. (1998). Formation of pluripotent stem cells in the mammalian embryo depends on the POU  
861 transcription factor Oct4. *Cell* *95*, 379-391.

862 Polo, J.M., Anderssen, E., Walsh, R.M., Schwarz, B.A., Nefzger, C.M., Lim, S.M., Borkent, M., Apostolou,  
863 E., Alaei, S., Cloutier, J., *et al.* (2012). A molecular roadmap of reprogramming somatic cells into iPS cells.  
864 *Cell* *151*, 1617-1632.

865 Schwarz, B.A., Bar-Nur, O., Silva, J.C., and Hochedlinger, K. (2014). Nanog is dispensable for the  
866 generation of induced pluripotent stem cells. *Current biology : CB* *24*, 347-350.

867 Sevilla, A., Papatsenko, D., Mazloom, A.R., Xu, H., Vasileva, A., Unwin, R.D., LeRoy, G., Chen, E.Y.,  
868 Garrett-Bakelman, F.E., Lee, D.F., *et al.* (2021). An *Esrrb* and Nanog Cell Fate Regulatory Module  
869 Controlled by Feed Forward Loop Interactions. *Front Cell Dev Biol* *9*, 630067.

870 Shanak, S., and Helms, V. (2020). DNA methylation and the core pluripotency network. *Dev Biol* *464*,  
871 145-160.

872 Sim, Y.J., Kim, M.S., Nayfeh, A., Yun, Y.J., Kim, S.J., Park, K.T., Kim, C.H., and Kim, K.S. (2017). 2i Maintains  
873 a Naive Ground State in ESCs through Two Distinct Epigenetic Mechanisms. *Stem cell reports* *8*, 1312-  
874 1328.

875 Soufi, A., Donahue, G., and Zaret, K.S. (2012). Facilitators and impediments of the pluripotency  
876 reprogramming factors' initial engagement with the genome. *Cell* *151*, 994-1004.  
877 Tan, M.H., Au, K.F., Leong, D.E., Foygel, K., Wong, W.H., and Yao, M.W. (2013). An Oct4-Sall4-Nanog  
878 network controls developmental progression in the pre-implantation mouse embryo. *Mol Syst Biol* *9*,  
879 632.  
880 Theunissen, T.W., and Jaenisch, R. (2014). Molecular control of induced pluripotency. *Cell stem cell* *14*,  
881 720-734.  
882 Tsubooka, N., Ichisaka, T., Okita, K., Takahashi, K., Nakagawa, M., and Yamanaka, S. (2009). Roles of Sall4  
883 in the generation of pluripotent stem cells from blastocysts and fibroblasts. *Genes Cells* *14*, 683-694.  
884 Wakayama, T., Perry, A.C., Zuccotti, M., Johnson, K.R., and Yanagimachi, R. (1998). Full-term  
885 development of mice from enucleated oocytes injected with cumulus cell nuclei. *Nature* *394*, 369-374.  
886 Wernig, M., Lengner, C.J., Hanna, J., Lodato, M.A., Steine, E., Foreman, R., Staerk, J., Markoulaki, S., and  
887 Jaenisch, R. (2008). A drug-inducible transgenic system for direct reprogramming of multiple somatic cell  
888 types. *Nat Biotechnol* *26*, 916-924.  
889 Xie, Z., Bailey, A., Kuleshov, M.V., Clarke, D.J.B., Evangelista, J.E., Jenkins, S.L., Lachmann, A.,  
890 Wojciechowicz, M.L., Kropiwnicki, E., Jagodnik, K.M., *et al.* (2021). Gene Set Knowledge Discovery with  
891 Enrichr. *Curr Protoc* *1*, e90.  
892
